# Supplementary material for: Juvenile Membranous Nephropathy Developed after Human Papillomavirus (HPV) Vaccination
Source: MDPI journal article supplement (doi:10.3390/vaccines10091442), 2022-09-01
Supplement: s1 [file s1]

| # | Visible? | Starred? | Bio View:<br>564 Proteins in 399 Clusters<br>With 7618 Hidden | Probability Legend: |            |            |            |           | Accession Number | Alternate ID | Molecular Weight | Protein Grouping Ambiguity | Fold Change by Category | Con | Dokyou Med |        |        |      |  |
|---|----------|----------|---------------------------------------------------------------|---------------------|------------|------------|------------|-----------|------------------|--------------|------------------|----------------------------|-------------------------|-----|------------|--------|--------|------|--|
|   |          |          |                                                               | over 95%            | 80% to 94% | 50% to 79% | 20% to 49% | 0% to 19% |                  |              |                  |                            |                         | 1h  | HPV-1-1    | HPV1-2 | HPV1-3 | HPV2 |  |
|   |          |          |                                                               |                     |            |            |            |           |                  |              |                  |                            |                         |     |            |        |        |      |  |
|   |          |          |                                                               |                     |            |            |            |           |                  |              |                  |                            |                         |     |            |        |        |      |  |
|   |          |          |                                                               |                     |            |            |            |           |                  |              |                  |                            |                         |     |            |        |        |      |  |
|   |          |          |                                                               |                     |            |            |            |           |                  |              |                  |                            |                         |     |            |        |        |      |  |
|   |          |          |                                                               |                     |            |            |            |           |                  |              |                  |                            |                         |     |            |        |        |      |  |
|   |          |          |                                                               |                     |            |            |            |           |                  |              |                  |                            |                         |     |            |        |        |      |  |
|   |          |          |                                                               |                     |            |            |            |           |                  |              |                  |                            |                         |     |            |        |        |      |  |
|   |          |          |                                                               |                     |            |            |            |           |                  |              |                  |                            |                         |     |            |        |        |      |  |
|   |          |          |                                                               |                     |            |            |            |           |                  |              |                  |                            |                         |     |            |        |        |      |  |
|   |          |          |                                                               |                     |            |            |            |           |                  |              |                  |                            |                         |     |            |        |        |      |  |
|   |          |          |                                                               |                     |            |            |            |           |                  |              |                  |                            |                         |     |            |        |        |      |  |
|   |          |          |                                                               |                     |            |            |            |           |                  |              |                  |                            |                         |     |            |        |        |      |  |
|   |          |          |                                                               |                     |            |            |            |           |                  |              |                  |                            |                         |     |            |        |        |      |  |
|   |          |          |                                                               |                     |            |            |            |           |                  |              |                  |                            |                         |     |            |        |        |      |  |
|   |          |          |                                                               |                     |            |            |            |           |                  |              |                  |                            |                         |     |            |        |        |      |  |
|   |          |          |                                                               |                     |            |            |            |           |                  |              |                  |                            |                         |     |            |        |        |      |  |
|   |          |          |                                                               |                     |            |            |            |           |                  |              |                  |                            |                         |     |            |        |        |      |  |
|   |          |          |                                                               |                     |            |            |            |           |                  |              |                  |                            |                         |     |            |        |        |      |  |
|   |          |          |                                                               |                     |            |            |            |           |                  |              |                  |                            |                         |     |            |        |        |      |  |
|   |          |          |                                                               |                     |            |            |            |           |                  |              |                  |                            |                         |     |            |        |        |      |  |
|   |          |          |                                                               |                     |            |            |            |           |                  |              |                  |                            |                         |     |            |        |        |      |  |
|   |          |          |                                                               |                     |            |            |            |           |                  |              |                  |                            |                         |     |            |        |        |      |  |
|   |          |          |                                                               |                     |            |            |            |           |                  |              |                  |                            |                         |     |            |        |        |      |  |
|   |          |          |                                                               |                     |            |            |            |           |                  |              |                  |                            |                         |     |            |        |        |      |  |
|   |          |          |                                                               |                     |            |            |            |           |                  |              |                  |                            |                         |     |            |        |        |      |  |
|   |          |          |                                                               |                     |            |            |            |           |                  |              |                  |                            |                         |     |            |        |        |      |  |
|   |          |          |                                                               |                     |            |            |            |           |                  |              |                  |                            |                         |     |            |        |        |      |  |
|   |          |          |                                                               |                     |            |            |            |           |                  |              |                  |                            |                         |     |            |        |        |      |  |
|   |          |          |                                                               |                     |            |            |            |           |                  |              |                  |                            |                         |     |            |        |        |      |  |
|   |          |          |                                                               |                     |            |            |            |           |                  |              |                  |                            |                         |     |            |        |        |      |  |
|   |          |          |                                                               |                     |            |            |            |           |                  |              |                  |                            |                         |     |            |        |        |      |  |
|   |          |          |                                                               |                     |            |            |            |           |                  |              |                  |                            |                         |     |            |        |        |      |  |
|   |          |          |                                                               |                     |            |            |            |           |                  |              |                  |                            |                         |     |            |        |        |      |  |
|   |          |          |                                                               |                     |            |            |            |           |                  |              |                  |                            |                         |     |            |        |        |      |  |
|   |          |          |                                                               |                     |            |            |            |           |                  |              |                  |                            |                         |     |            |        |        |      |  |
|   |          |          |                                                               |                     |            |            |            |           |                  |              |                  |                            |                         |     |            |        |        |      |  |
|   |          |          |                                                               |                     |            |            |            |           |                  |              |                  |                            |                         |     |            |        |        |      |  |
|   |          |          |                                                               |                     |            |            |            |           |                  |              |                  |                            |                         |     |            |        |        |      |  |
|   |          |          |                                                               |                     |            |            |            |           |                  |              |                  |                            |                         |     |            |        |        |      |  |
|   |          |          |                                                               |                     |            |            |            |           |                  |              |                  |                            |                         |     |            |        |        |      |  |
|   |          |          |                                                               |                     |            |            |            |           |                  |              |                  |                            |                         |     |            |        |        |      |  |
|   |          |          |                                                               |                     |            |            |            |           |                  |              |                  |                            |                         |     |            |        |        |      |  |
|   |          |          |                                                               |                     |            |            |            |           |                  |              |                  |                            |                         |     |            |        |        |      |  |
|   |          |          |                                                               |                     |            |            |            |           |                  |              |                  |                            |                         |     |            |        |        |      |  |
|   |          |          |                                                               |                     |            |            |            |           |                  |              |                  |                            |                         |     |            |        |        |      |  |
|   |          |          |                                                               |                     |            |            |            |           |                  |              |                  |                            |                         |     |            |        |        |      |  |
|   |          |          |                                                               |                     |            |            |            |           |                  |              |                  |                            |                         |     |            |        |        |      |  |
|   |          |          |                                                               |                     |            |            |            |           |                  |              |                  |                            |                         |     |            |        |        |      |  |
|   |          |          |                                                               |                     |            |            |            |           |                  |              |                  |                            |                         |     |            |        |        |      |  |
|   |          |          |                                                               |                     |            |            |            |           |                  |              |                  |                            |                         |     |            |        |        |      |  |
|   |          |          |                                                               |                     |            |            |            |           |                  |              |                  |                            |                         |     |            |        |        |      |  |
|   |          |          |                                                               |                     |            |            |            |           |                  |              |                  |                            |                         |     |            |        |        |      |  |
|   |          |          |                                                               |                     |            |            |            |           |                  |              |                  |                            |                         |     |            |        |        |      |  |
|   |          |          |                                                               |                     |            |            |            |           |                  |              |                  |                            |                         |     |            |        |        |      |  |
|   |          |          |                                                               |                     |            |            |            |           |                  |              |                  |                            |                         |     |            |        |        |      |  |
|   |          |          |                                                               |                     |            |            |            |           |                  |              |                  |                            |                         |     |            |        |        |      |  |
|   |          |          |                                                               |                     |            |            |            |           |                  |              |                  |                            |                         |     |            |        |        |      |  |
|   |          |          |                                                               |                     |            |            |            |           |                  |              |                  |                            |                         |     |            |        |        |      |  |
|   |          |          |                                                               |                     |            |            |            |           |                  |              |                  |                            |                         |     |            |        |        |      |  |
|   |          |          |                                                               |                     |            |            |            |           |                  |              |                  |                            |                         |     |            |        |        |      |  |
|   |          |          |                                                               |                     |            |            |            |           |                  |              |                  |                            |                         |     |            |        |        |      |  |
|   |          |          |                                                               |                     |            |            |            |           |                  |              |                  |                            |                         |     |            |        |        |      |  |

| # | Visible? | Starred? | Bio View:<br>564 Proteins in 399 Clusters<br>With 7618 Hidden                                           | Probability Legend: |            |            |            |           | Accession Number | Alternate ID | Molecular Weight | Protein Grouping Ambiguity | Fold Change by Category | Con | Dokyou Med |        |        |      |
|---|----------|----------|---------------------------------------------------------------------------------------------------------|---------------------|------------|------------|------------|-----------|------------------|--------------|------------------|----------------------------|-------------------------|-----|------------|--------|--------|------|
|   |          |          |                                                                                                         | over 95%            | 80% to 94% | 50% to 79% | 20% to 49% | 0% to 19% |                  |              |                  |                            |                         | 1h  | HPV-1-1    | HPV1-2 | HPV1-3 | HPV2 |
|   |          |          | Cluster of Complement factor H OS=Homo sapiens OX=9606 GN=CFH PE=1 SV=4 (P08603)                        |                     |            |            |            |           | ..               | CFH          | 139 kDa          | ★                          | INF                     |     | 3          | 4      | 2      | 3    |
|   |          |          | Secretory phospholipase A2 receptor OS=Homo sapiens OX=9606 GN=PLA2R1 PE=1 SV=2                         |                     |            |            |            |           | ..               | PLA2R1       | 169 kDa          |                            | INF                     |     |            | 0      |        | 5    |
|   |          |          | Cluster of Vimentin OS=Homo sapiens OX=9606 GN=VIM PE=1 SV=4 (P08670)                                   |                     |            |            |            |           | ..               | VIM          | 54 kDa           | ★                          | 0.2                     | 624 | 238        | 243    | 229    | 261  |
|   |          |          | Cluster of Actin, cytoplasmic 2 OS=Homo sapiens OX=9606 GN=ACTG1 PE=1 SV=1 (P63261)                     |                     |            |            |            |           | ..               | ACTG1        | 42 kDa           | ★                          | 0.2                     | 494 | 249        | 230    | 234    | 227  |
|   |          |          | Cluster of Alpha-actinin-4 OS=Homo sapiens OX=9606 GN=ACTN4 PE=1 SV=2 (O43707)                          |                     |            |            |            |           | ..               | ACTN4        | 105 kDa          | ★                          | 0.2                     | 264 | 85         | 92     | 81     | 153  |
|   |          |          | Myosin-9 OS=Homo sapiens OX=9606 GN=MYH9 PE=1 SV=4                                                      |                     |            |            |            |           | ..               | MYH9         | 227 kDa          | ★                          | 0.2                     | 213 | 78         | 85     | 93     | 185  |
|   |          |          | Cluster of Hemoglobin subunit alpha OS=Homo sapiens OX=9606 GN=HBA1 PE=1 SV=2 (P69905)                  |                     |            |            |            |           | ..               | HBA1         | 15 kDa           | ★                          | 0.7                     | 65  | 93         | 94     | 108    | 94   |
|   |          |          | Cluster of Hemoglobin subunit beta OS=Homo sapiens OX=9606 GN=HBB PE=1 SV=2 (P68871)                    |                     |            |            |            |           | ..               | HBB          | 16 kDa           | ★                          | 0.5                     | 68  | 73         | 73     | 76     | 100  |
|   |          |          | Collagen alpha-3(VI) chain OS=Homo sapiens OX=9606 GN=COL6A3 PE=1 SV=5                                  |                     |            |            |            |           | ..               | COL6A3       | 344 kDa          |                            | 0.2                     | 141 | 45         | 44     | 35     | 92   |
|   |          |          | Histone H4 OS=Homo sapiens OX=9606 GN=H4C1 PE=1 SV=2                                                    |                     |            |            |            |           | ..               | H4C1         | 11 kDa           |                            | 0.09                    | 187 | 35         | 37     | 31     | 52   |
|   |          |          | Cluster of Histone H2A type 1-B/E OS=Homo sapiens OX=9606 GN=H2AC4 PE=1 SV=2 (P04908)                   |                     |            |            |            |           | ..               | H2AC4        | 14 kDa           | ★                          | 0.1                     | 135 | 25         | 23     | 22     | 70   |
|   |          |          | Cluster of Tubulin beta chain OS=Homo sapiens OX=9606 GN=TUBB PE=1 SV=2 (P07437)                        |                     |            |            |            |           | ..               | TUBB         | 50 kDa           | ★                          | 0.2                     | 103 | 36         | 36     | 34     | 59   |
|   |          |          | Cluster of Histone H2B type F-S OS=Homo sapiens OX=9606 GN=H2BS1 PE=1 SV=2 (P57053)                     |                     |            |            |            |           | ..               | H2BS1        | 14 kDa           | ★                          | 0.2                     | 99  | 46         | 40     | 46     | 60   |
|   |          |          | Laminin subunit beta-2 OS=Homo sapiens OX=9606 GN=LAMB2 PE=1 SV=2                                       |                     |            |            |            |           | ..               | LAMB2        | 196 kDa          |                            | 0.2                     | 100 | 27         | 32     | 28     | 55   |
|   |          |          | Cluster of Tubulin alpha-1C chain OS=Homo sapiens OX=9606 GN=TUBA1C PE=1 SV=1 (Q9BQE3)                  |                     |            |            |            |           | ..               | TUBA1C       | 50 kDa           | ★                          | 0.1                     | 101 | 24         | 24     | 27     | 53   |
|   |          |          | Prelamin-A/C OS=Homo sapiens OX=9606 GN=LMNA PE=1 SV=1                                                  |                     |            |            |            |           | ..               | LMNA         | 74 kDa           | ★                          | 0.2                     | 92  | 28         | 31     | 31     | 50   |
|   |          |          | Laminin subunit alpha-5 OS=Homo sapiens OX=9606 GN=LAMA5 PE=1 SV=8                                      |                     |            |            |            |           | ..               | LAMA5        | 400 kDa          |                            | 0.2                     | 77  | 25         | 30     | 31     | 54   |
|   |          |          | PDZ and LIM domain protein 2 OS=Homo sapiens OX=9606 GN=PDLIM2 PE=1 SV=1                                |                     |            |            |            |           | ..               | PDLIM2       | 37 kDa           |                            | 0.1                     | 80  | 20         | 23     | 18     | 28   |
|   |          |          | Talin-1 OS=Homo sapiens OX=9606 GN=TLN1 PE=1 SV=3                                                       |                     |            |            |            |           | ..               | TLN1         | 270 kDa          | ★                          | 0.2                     | 62  | 19         | 19     | 23     | 62   |
|   |          |          | Cluster of Annexin A2 OS=Homo sapiens OX=9606 GN=ANXA2 PE=1 SV=2 (P07355)                               |                     |            |            |            |           | ..               | ANXA2        | 39 kDa           | ★                          | 0.2                     | 61  | 22         | 25     | 23     | 38   |
|   |          |          | Nestin OS=Homo sapiens OX=9606 GN=NES PE=1 SV=2                                                         |                     |            |            |            |           | ..               | NES          | 177 kDa          |                            | 0.2                     | 54  | 24         | 22     | 27     | 42   |
|   |          |          | Vinculin OS=Homo sapiens OX=9606 GN=VCL PE=1 SV=4                                                       |                     |            |            |            |           | ..               | VCL          | 124 kDa          |                            | 0.2                     | 51  | 13         | 13     | 15     | 40   |
|   |          |          | Keratin, type II cytoskeletal 72 OS=Homo sapiens OX=9606 GN=KRT72 PE=1 SV=2                             |                     |            |            |            |           | ..               | KRT72        | 56 kDa           | ★                          | 10                      | 6   | 161        | 150    | 159    | 98   |
|   |          |          | Keratin, type II cytoskeletal 80 OS=Homo sapiens OX=9606 GN=KRT80 PE=1 SV=2                             |                     |            |            |            |           | ..               | KRT80        | 51 kDa           | ★                          | 0.8                     | 41  | 63         | 64     | 69     | 100  |
|   |          |          | Albumin OS=Homo sapiens OX=9606 GN=ALB PE=1 SV=2                                                        |                     |            |            |            |           | ..               | ALB          | 69 kDa           |                            | 0.3                     | 74  | 52         | 56     | 48     | 71   |
|   |          |          | Cluster of Keratin, type II cuticular Hb5 OS=Homo sapiens OX=9606 GN=KRT85 PE=1 SV=1 (P78386)           |                     |            |            |            |           | ..               | KRT85        | 56 kDa           | ★                          | 1.5                     | 15  | 57         | 59     | 50     | 43   |
|   |          |          | Cluster of Glyceraldehyde-3-phosphate dehydrogenase OS=Homo sapiens OX=9606 GN=GAPDH PE=1 SV=3 (P044... |                     |            |            |            |           | ..               | GAPDH        | 36 kDa           | ★                          | 0.4                     | 38  | 37         | 36     | 29     | 42   |
|   |          |          | Cluster of Ubiquitin-40S ribosomal protein S27a OS=Homo sapiens OX=9606 GN=RPS27A PE=1 SV=2 (P62979)    |                     |            |            |            |           | ..               | RPS27A       | 18 kDa           | ★                          | 0.5                     | 27  | 28         | 41     | 25     | 36   |
|   |          |          | Cluster of Alpha-enolase OS=Homo sapiens OX=9606 GN=ENO1 PE=1 SV=2 (P06733)                             |                     |            |            |            |           | ..               | ENO1         | 47 kDa           | ★                          | 0.9                     | 12  | 21         | 21     | 20     | 37   |

| # | Visible? | Starred? | Bio View:<br>564 Proteins in 399 Clusters<br>With 7618 Hidden                                                   | Probability Legend: |            |            |            |           | Accession Number | Alternate ID | Molecular Weight | Protein Grouping Ambiguity | Fold Change by Category | Con | Dokyou Med |        |        |      |
|---|----------|----------|-----------------------------------------------------------------------------------------------------------------|---------------------|------------|------------|------------|-----------|------------------|--------------|------------------|----------------------------|-------------------------|-----|------------|--------|--------|------|
|   |          |          |                                                                                                                 | over 95%            | 80% to 94% | 50% to 79% | 20% to 49% | 0% to 19% |                  |              |                  |                            |                         | 1h  | HPV-1-1    | HPV1-2 | HPV1-3 | HPV2 |
|   |          |          | Nidogen-1 OS=Homo sapiens OX=9606 GN=NID1 PE=1 SV=3                                                             |                     |            |            |            |           | ..               | NID1         | 136 kDa          |                            | 0.3                     | 30  | 17         | 16     | 19     | 25   |
|   |          |          | Filamin-A OS=Homo sapiens OX=9606 GN=FLNA PE=1 SV=4                                                             |                     |            |            |            |           | ..               | FLNA         | 281 kDa          | ★                          | 0.2                     | 39  | 14         | 16     | 16     | 32   |
|   |          |          | Basement membrane-specific heparan sulfate proteoglycan core protein OS=Homo sapiens OX=9606 GN=HSPG2 PE=1 SV=3 |                     |            |            |            |           | ..               | HSPG2        | 469 kDa          |                            | 0.3                     | 26  | 13         | 14     | 11     | 46   |
|   |          |          | Cluster of Heat shock 70 kDa protein 1A OS=Homo sapiens OX=9606 GN=HSPA1A PE=1 SV=1 (P0DMV8)                    |                     |            |            |            |           | ..               | HSPA1A       | 70 kDa           | ★                          | 0.2                     | 34  | 9          | 16     | 11     | 25   |
|   |          |          | Heat shock protein beta-1 OS=Homo sapiens OX=9606 GN=HSPB1 PE=1 SV=2                                            |                     |            |            |            |           | ..               | HSPB1        | 23 kDa           |                            | 0.5                     | 16  | 12         | 17     | 16     | 31   |
|   |          |          | Agrin OS=Homo sapiens OX=9606 GN=AGRN PE=1 SV=6                                                                 |                     |            |            |            |           | ..               | AGRN         | 217 kDa          |                            | 0.2                     | 30  | 12         | 18     | 16     | 21   |
|   |          |          | Keratin, type II cuticular Hb2 OS=Homo sapiens OX=9606 GN=KRT82 PE=1 SV=3                                       |                     |            |            |            |           | ..               | KRT82        | 57 kDa           | ★                          | INF                     |     | 13         | 19     | 13     | 37   |
|   |          |          | Laminin subunit gamma-1 OS=Homo sapiens OX=9606 GN=LAMC1 PE=1 SV=3                                              |                     |            |            |            |           | ..               | LAMC1        | 178 kDa          |                            | 0.4                     | 19  | 16         | 16     | 13     | 26   |
|   |          |          | Collagen alpha-1(VI) chain OS=Homo sapiens OX=9606 GN=COL6A1 PE=1 SV=3                                          |                     |            |            |            |           | ..               | COL6A1       | 109 kDa          |                            | 0.2                     | 26  | 13         | 10     | 10     | 24   |
|   |          |          | Cluster of 14-3-3 protein zeta/delta OS=Homo sapiens OX=9606 GN=YWHAZ PE=1 SV=1 (P63104)                        |                     |            |            |            |           | ..               | YWHAZ        | 28 kDa           | ★                          | 0.3                     | 22  | 9          | 15     | 10     | 31   |
|   |          |          | Cluster of Heat shock cognate 71 kDa protein OS=Homo sapiens OX=9606 GN=HSPA8 PE=1 SV=1 (P11142)                |                     |            |            |            |           | ..               | HSPA8        | 71 kDa           | ★                          | 0.5                     | 17  | 12         | 17     | 15     | 29   |
|   |          |          | Fibronectin OS=Homo sapiens OX=9606 GN=FN1 PE=1 SV=5                                                            |                     |            |            |            |           | ..               | FN1          | 272 kDa          |                            | 0.5                     | 15  | 12         | 21     | 11     | 25   |
|   |          |          | Cluster of O14950                                                                                               |                     |            |            |            |           | ..               | MYL12B       | 20 kDa           | ★                          | 0.2                     | 25  | 9          | 11     | 11     | 18   |
|   |          |          | Myosin-10 OS=Homo sapiens OX=9606 GN=MYH10 PE=1 SV=3                                                            |                     |            |            |            |           | ..               | MYH10        | 229 kDa          | ★                          | 0.4                     | 21  | 15         | 17     | 18     | 22   |
|   |          |          | Protein S100-A6 OS=Homo sapiens OX=9606 GN=S100A6 PE=1 SV=1                                                     |                     |            |            |            |           | ..               | S100A6       | 10 kDa           |                            | 0.3                     | 25  | 14         | 13     | 16     | 15   |
|   |          |          | Myosin light polypeptide 6 OS=Homo sapiens OX=9606 GN=MYL6 PE=1 SV=2                                            |                     |            |            |            |           | ..               | MYL6         | 17 kDa           | ★                          | 0.3                     | 21  | 11         | 11     | 13     | 18   |
|   |          |          | Collagen alpha-2(IV) chain OS=Homo sapiens OX=9606 GN=COL4A2 PE=1 SV=4                                          |                     |            |            |            |           | ..               | COL4A2       | 168 kDa          | ★                          | 0.2                     | 31  | 9          | 9      | 8      | 24   |
|   |          |          | Cluster of Histone H3.1t OS=Homo sapiens OX=9606 GN=H3-4 PE=1 SV=3 (Q16695)                                     |                     |            |            |            |           | ..               | H3-4         | 16 kDa           | ★                          | 0.1                     | 38  | 6          | 6      | 6      | 22   |
|   |          |          | Dermcidin OS=Homo sapiens OX=9606 GN=DCD PE=1 SV=2                                                              |                     |            |            |            |           | ..               | DCD          | 11 kDa           |                            | 3.0                     | 2   | 14         | 14     | 11     | 17   |
|   |          |          | Annexin A1 OS=Homo sapiens OX=9606 GN=ANXA1 PE=1 SV=2                                                           |                     |            |            |            |           | ..               | ANXA1        | 39 kDa           |                            | 0.4                     | 11  | 8          | 13     | 10     | 15   |
|   |          |          | ATP synthase subunit beta, mitochondrial OS=Homo sapiens OX=9606 GN=ATP5F1B PE=1 SV=3                           |                     |            |            |            |           | ..               | ATP5F1B      | 57 kDa           |                            | 0.3                     | 17  | 8          | 7      | 11     | 16   |
|   |          |          | Cluster of Peroxiredoxin-1 OS=Homo sapiens OX=9606 GN=PRDX1 PE=1 SV=1 (Q06830)                                  |                     |            |            |            |           | ..               | PRDX1        | 22 kDa           | ★                          | 0.5                     | 12  | 13         | 13     | 8      | 21   |
|   |          |          | Putative tubulin-like protein alpha-4B OS=Homo sapiens OX=9606 GN=TUBA4B PE=5 SV=2                              |                     |            |            |            |           | ..               | TUBA4B       | 28 kDa           | ★                          | 0.1                     | 24  | 6          | 6      | 5      | 14   |
|   |          |          | Neuroblast differentiation-associated protein AHNAK OS=Homo sapiens OX=9606 GN=AHNAK PE=1 SV=2                  |                     |            |            |            |           | ..               | AHNAK        | 629 kDa          |                            | 0.8                     | 11  | 18         | 20     | 18     | 31   |
|   |          |          | Cluster of Histone H1.2 OS=Homo sapiens OX=9606 GN=H1-2 PE=1 SV=2 (P16403)                                      |                     |            |            |            |           | ..               | H1-2         | 21 kDa           | ★                          | 0.2                     | 23  | 6          | 4      | 9      | 15   |
|   |          |          | Cluster of Tropomyosin alpha-4 chain OS=Homo sapiens OX=9606 GN=TPM4 PE=1 SV=3 (P67936)                         |                     |            |            |            |           | ..               | TPM4         | 29 kDa           | ★                          | 0.2                     | 20  | 9          | 8      | 6      | 15   |
|   |          |          | Cluster of Putative elongation factor 1-alpha-like 3 OS=Homo sapiens OX=9606 GN=EEF1A1P5 PE=5 SV=1 (Q5VTE...    |                     |            |            |            |           | ..               | EEF1A1...    | 50 kDa           | ★                          | 0.2                     | 19  | 8          | 6      | 10     | 10   |
|   |          |          | Myosin-14 OS=Homo sapiens OX=9606 GN=MYH14 PE=1 SV=2                                                            |                     |            |            |            |           | ..               | MYH14        | 228 kDa          | ★                          | 0.2                     | 19  | 5          | 6      | 6      | 25   |
|   |          |          | Pyruvate kinase PKM OS=Homo sapiens OX=9606 GN=PKM PE=1 SV=4                                                    |                     |            |            |            |           | ..               | PKM          | 58 kDa           | ★                          | 1.3                     | 4   | 9          | 10     | 12     | 17   |

| # | Visible? | Starred? |                                                                                                  | Probability Legend: |  |  |  |  | Accession Number | Alternate ID | Molecular Weight | Protein Grouping Ambiguity | Fold Change by Category | Con | Dokyou Med |        |        |      |
|---|----------|----------|--------------------------------------------------------------------------------------------------|---------------------|--|--|--|--|------------------|--------------|------------------|----------------------------|-------------------------|-----|------------|--------|--------|------|
|   |          |          |                                                                                                  |                     |  |  |  |  |                  |              |                  |                            |                         | 1h  | HPV-1-1    | HPV1-2 | HPV1-3 | HPV2 |
|   |          |          | Bio View:<br>564 Proteins in 399 Clusters<br>With 7618 Hidden                                    |                     |  |  |  |  |                  |              |                  |                            |                         |     |            |        |        |      |
|   |          |          | Peroxiredoxin-2 OS=Homo sapiens OX=9606 GN=PRDX2 PE=1 SV=5                                       |                     |  |  |  |  | ..               | PRDX2        | 22 kDa           | ★                          | 0.4                     | 9   | 10         | 8      | 4      | 16   |
|   |          |          | Gelsolin OS=Homo sapiens OX=9606 GN=GSN PE=1 SV=1                                                |                     |  |  |  |  | ..               | GSN          | 86 kDa           |                            | 0.3                     | 12  | 6          | 7      | 6      | 19   |
|   |          |          | Spectrin alpha chain, non-erythrocytic 1 OS=Homo sapiens OX=9606 GN=SPTAN1 PE=1 SV=3             |                     |  |  |  |  | ..               | SPTAN1       | 285 kDa          |                            | 0.3                     | 16  | 7          | 7      | 12     | 23   |
|   |          |          | Cluster of Heat shock protein HSP 90-beta OS=Homo sapiens OX=9606 GN=HSP90AB1 PE=1 SV=4 (P08238) |                     |  |  |  |  | ..               | HSP90A...    | 83 kDa           | ★                          | 0.4                     | 12  | 10         | 14     | 5      | 12   |
|   |          |          | Cluster of Serpin B3 OS=Homo sapiens OX=9606 GN=SERPINB3 PE=1 SV=2 (P29508)                      |                     |  |  |  |  | ..               | SERPINB3     | 45 kDa           | ★                          | INF                     |     | 10         | 8      | 8      | 21   |
|   |          |          | Cluster of Moesin OS=Homo sapiens OX=9606 GN=MSN PE=1 SV=3 (P26038)                              |                     |  |  |  |  | ..               | MSN          | 68 kDa           | ★                          | 0.2                     | 20  | 7          | 6      | 8      | 16   |
|   |          |          | Calmodulin-like protein 3 OS=Homo sapiens OX=9606 GN=CALML3 PE=1 SV=2                            |                     |  |  |  |  | ..               | CALML3       | 17 kDa           | ★                          | 1.2                     | 4   | 10         | 14     | 9      | 12   |
|   |          |          | Plectin OS=Homo sapiens OX=9606 GN=PLEC PE=1 SV=3                                                |                     |  |  |  |  | ..               | PLEC         | 532 kDa          | ★                          | 0.4                     | 18  | 7          | 19     | 7      | 30   |
|   |          |          | Titin OS=Homo sapiens OX=9606 GN=TTN PE=1 SV=4                                                   |                     |  |  |  |  | ..               | TTN          | 3816 kDa         | ★                          | 1.8                     | 11  | 50         | 63     | 32     | 40   |
|   |          |          | Annexin A5 OS=Homo sapiens OX=9606 GN=ANXA5 PE=1 SV=2                                            |                     |  |  |  |  | ..               | ANXA5        | 36 kDa           |                            | 0.2                     | 15  | 5          | 6      | 7      | 9    |
|   |          |          | ATP synthase subunit alpha, mitochondrial OS=Homo sapiens OX=9606 GN=ATP5F1A PE=1 SV=1           |                     |  |  |  |  | ..               | ATP5F1A      | 60 kDa           |                            | 0.2                     | 14  | 7          | 3      | 6      | 11   |
|   |          |          | Na(+)/H(+) exchange regulatory cofactor NHE-RF2 OS=Homo sapiens OX=9606 GN=SLC9A3R2 PE=1 SV=2    |                     |  |  |  |  | ..               | SLC9A3...    | 37 kDa           |                            | 0.1                     | 16  | 4          | 4      | 5      | 8    |
|   |          |          | Synaptopodin OS=Homo sapiens OX=9606 GN=SYNPO PE=1 SV=2                                          |                     |  |  |  |  | ..               | SYNPO        | 99 kDa           |                            | 0.2                     | 16  | 4          | 6      | 7      | 9    |
|   |          |          | Calmodulin OS=Homo sapiens GN=CALM1 PE=1 SV=2                                                    |                     |  |  |  |  | ..               | ?            |                  | ★                          | 0.4                     | 9   | 7          | 11     | 8      | 11   |
|   |          |          | Collagen alpha-1(XVIII) chain OS=Homo sapiens OX=9606 GN=COL18A1 PE=1 SV=5                       |                     |  |  |  |  | ..               | COL18...     | 178 kDa          | ★                          | 0.3                     | 13  | 8          | 6      | 6      | 12   |
|   |          |          | Collagen alpha-2(VI) chain OS=Homo sapiens OX=9606 GN=COL6A2 PE=1 SV=4                           |                     |  |  |  |  | ..               | COL6A2       | 109 kDa          |                            | 0.3                     | 10  | 8          | 8      | 3      | 12   |
|   |          |          | Clathrin heavy chain 1 OS=Homo sapiens OX=9606 GN=CLTC PE=1 SV=5                                 |                     |  |  |  |  | ..               | CLTC         | 192 kDa          | ★                          | 0.9                     | 4   | 10         | 8      | 3      | 15   |
|   |          |          | Putative protein FAM90A2P OS=Homo sapiens OX=9606 GN=FAM90A2P PE=5 SV=2                          |                     |  |  |  |  | ..               | FAM90...     | 50 kDa           | ★                          | INF                     |     |            | 32     | 1      |      |
|   |          |          | Peptidyl-prolyl cis-trans isomerase A OS=Homo sapiens OX=9606 GN=PPIA PE=1 SV=2                  |                     |  |  |  |  | ..               | PPIA         | 18 kDa           |                            | 0.3                     | 8   | 4          | 4      | 3      | 16   |
|   |          |          | Transgelin-2 OS=Homo sapiens OX=9606 GN=TAGLN2 PE=1 SV=3                                         |                     |  |  |  |  | ..               | TAGLN2       | 22 kDa           | ★                          | 0.1                     | 15  | 3          | 2      | 4      | 12   |
|   |          |          | Peroxiredoxin-6 OS=Homo sapiens OX=9606 GN=PRDX6 PE=1 SV=3                                       |                     |  |  |  |  | ..               | PRDX6        | 25 kDa           |                            | 0.4                     | 7   | 4          | 7      | 4      | 10   |
|   |          |          | Cluster of Phosphoglycerate kinase 1 OS=Homo sapiens OX=9606 GN=PGK1 PE=1 SV=3 (P00558)          |                     |  |  |  |  | ..               | PGK1         | 45 kDa           | ★                          | 0.3                     | 9   | 4          | 7      | 7      | 10   |
|   |          |          | Collagen alpha-3(IV) chain OS=Homo sapiens OX=9606 GN=COL4A3 PE=1 SV=3                           |                     |  |  |  |  | ..               | COL4A3       | 162 kDa          |                            | 0.2                     | 13  | 6          | 7      | 2      | 7    |
|   |          |          | 78 kDa glucose-regulated protein OS=Homo sapiens GN=HSPA5 PE=1 SV=2                              |                     |  |  |  |  | ..               | ?            |                  | ★                          | 0.5                     | 5   | 4          | 7      | 4      | 10   |
|   |          |          | Podocin OS=Homo sapiens OX=9606 GN=NPHS2 PE=1 SV=1                                               |                     |  |  |  |  | ..               | NPHS2        | 42 kDa           |                            | 0.1                     | 14  | 7          | 2      | 3      | 7    |
|   |          |          | Collagen alpha-1(IV) chain OS=Homo sapiens OX=9606 GN=COL4A1 PE=1 SV=4                           |                     |  |  |  |  | ..               | COL4A1       | 161 kDa          | ★                          | 0.6                     | 7   | 9          | 13     | 10     | 8    |
|   |          |          | Collagen alpha-4(IV) chain OS=Homo sapiens OX=9606 GN=COL4A4 PE=1 SV=3                           |                     |  |  |  |  | ..               | COL4A4       | 164 kDa          | ★                          | 3.7                     | 1   |            | 10     | 12     | 13   |
|   |          |          | Podocalyxin OS=Homo sapiens OX=9606 GN=PODXL PE=1 SV=2                                           |                     |  |  |  |  | ..               | PODXL        | 59 kDa           |                            | 0.2                     | 9   | 5          | 4      | 4      | 8    |
|   |          |          | Ezrin OS=Homo sapiens OX=9606 GN=EZR PE=1 SV=4                                                   |                     |  |  |  |  | ..               | EZR          | 69 kDa           | ★                          | 0.2                     | 10  | 6          | 3      | 5      | 9    |

| # | Visible? | Starred? |                                                                                                                | Probability Legend: |  |  |  |  | Accession Number | Alternate ID | Molecular Weight | Protein Grouping Ambiguity | Fold Change by Category | Con | Dokyou Med |        |        |      |
|---|----------|----------|----------------------------------------------------------------------------------------------------------------|---------------------|--|--|--|--|------------------|--------------|------------------|----------------------------|-------------------------|-----|------------|--------|--------|------|
|   |          |          |                                                                                                                |                     |  |  |  |  |                  |              |                  |                            |                         | 1h  | HPV-1-1    | HPV1-2 | HPV1-3 | HPV2 |
|   |          |          | Bio View:<br>564 Proteins in 399 Clusters<br>With 7618 Hidden                                                  |                     |  |  |  |  |                  |              |                  |                            |                         |     |            |        |        |      |
|   |          |          | Unconventional myosin-Ic OS=Homo sapiens OX=9606 GN=MYO1C PE=1 SV=4                                            |                     |  |  |  |  | ..               | MYO1C        | 122 kDa          | ★                          | 0.2                     | 9   | 1          | 3      | 4      | 13   |
|   |          |          | Profilin-1 OS=Homo sapiens OX=9606 GN=PFN1 PE=1 SV=2                                                           |                     |  |  |  |  | ..               | PFN1         | 15 kDa           |                            | 0.3                     | 6   | 2          | 3      | 4      | 7    |
|   |          |          | Protein-glutamine gamma-glutamyltransferase K OS=Homo sapiens OX=9606 GN=TGM1 PE=1 SV=4                        |                     |  |  |  |  | ..               | TGM1         | 90 kDa           |                            | INF                     |     | 6          | 6      | 5      | 13   |
|   |          |          | Spectrin beta chain, non-erythrocytic 1 OS=Homo sapiens OX=9606 GN=SPTBN1 PE=1 SV=2                            |                     |  |  |  |  | ..               | SPTBN1       | 275 kDa          | ★                          | 0.06                    | 18  | 1          | 2      |        | 9    |
|   |          |          | Neprilysin OS=Homo sapiens OX=9606 GN=MME PE=1 SV=2                                                            |                     |  |  |  |  | ..               | MME          | 86 kDa           |                            | 0.02                    | 24  | 0          | 0      |        | 5    |
|   |          |          | Tight junction protein ZO-1 OS=Homo sapiens OX=9606 GN=TJP1 PE=1 SV=3                                          |                     |  |  |  |  | ..               | TJP1         | 195 kDa          | ★                          | 0.1                     | 15  | 1          | 4      | 1      | 10   |
|   |          |          | Glutathione S-transferase P OS=Homo sapiens OX=9606 GN=GSTP1 PE=1 SV=2                                         |                     |  |  |  |  | ..               | GSTP1        | 23 kDa           |                            | 0.3                     | 5   | 4          | 4      | 4      | 3    |
|   |          |          | Heterogeneous nuclear ribonucleoproteins A2/B1 OS=Homo sapiens OX=9606 GN=HNRNPA2B1 PE=1 SV=2                  |                     |  |  |  |  | ..               | HNRNP...     | 37 kDa           | ★                          | 0.2                     | 8   | 3          | 4      | 2      | 10   |
|   |          |          | Cluster of Ras-related protein Rap-1A OS=Homo sapiens OX=9606 GN=RAP1A PE=1 SV=1 (P62834)                      |                     |  |  |  |  | ..               | RAP1A        | 21 kDa           | ★                          | 0.3                     | 5   | 2          | 2      | 3      | 6    |
|   |          |          | Alpha-2-macroglobulin OS=Homo sapiens OX=9606 GN=A2M PE=1 SV=3                                                 |                     |  |  |  |  | ..               | A2M          | 163 kDa          | ★                          | INF                     | 0   | 4          | 5      | 3      | 12   |
|   |          |          | Thioredoxin OS=Homo sapiens OX=9606 GN=TXN PE=1 SV=3                                                           |                     |  |  |  |  | ..               | TXN          | 12 kDa           |                            | INF                     |     | 4          | 3      | 5      | 7    |
|   |          |          | Cysteine and glycine-rich protein 1 OS=Homo sapiens OX=9606 GN=CSRP1 PE=1 SV=3                                 |                     |  |  |  |  | ..               | CSRP1        | 21 kDa           |                            | 0.2                     | 7   | 3          | 3      | 3      | 4    |
|   |          |          | Cluster of F-actin-capping protein subunit alpha-2 OS=Homo sapiens OX=9606 GN=CAPZA2 PE=1 SV=3 (P47755)        |                     |  |  |  |  | ..               | CAPZA2       | 33 kDa           | ★                          | 0.3                     | 5   | 2          | 3      | 3      | 7    |
|   |          |          | Heterogeneous nuclear ribonucleoprotein K OS=Homo sapiens OX=9606 GN=HNRNPK PE=1 SV=1                          |                     |  |  |  |  | ..               | HNRNPK       | 51 kDa           |                            | 0.6                     | 3   | 3          | 6      | 1      | 7    |
|   |          |          | Protein S100-A9 OS=Homo sapiens OX=9606 GN=S100A9 PE=1 SV=1                                                    |                     |  |  |  |  | ..               | S100A9       | 13 kDa           |                            | 0.4                     | 4   | 3          | 4      | 3      | 5    |
|   |          |          | Cluster of Calpain small subunit 1 OS=Homo sapiens OX=9606 GN=CAPNS1 PE=1 SV=1 (P04632)                        |                     |  |  |  |  | ..               | CAPNS1       | 28 kDa           | ★                          | 0.4                     | 4   | 4          | 2      |        | 10   |
|   |          |          | Keratinocyte proline-rich protein OS=Homo sapiens OX=9606 GN=KPRP PE=1 SV=1                                    |                     |  |  |  |  | ..               | KPRP         | 64 kDa           |                            | INF                     |     | 7          | 8      | 3      | 7    |
|   |          |          | Clusterin OS=Homo sapiens OX=9606 GN=CLU PE=1 SV=1                                                             |                     |  |  |  |  | ..               | CLU          | 52 kDa           |                            | 0.5                     | 3   | 2          | 3      | 4      | 6    |
|   |          |          | Cluster of Heterogeneous nuclear ribonucleoproteins C1/C2 OS=Homo sapiens OX=9606 GN=HNRNPC PE=1 SV=4 (P61204) |                     |  |  |  |  | ..               | HNRNPC       | 34 kDa           | ★                          | 0.3                     | 6   | 2          | 3      | 3      | 7    |
|   |          |          | Endoplasmic reticulum protein OS=Homo sapiens OX=9606 GN=HSP90B1 PE=1 SV=1                                     |                     |  |  |  |  | ..               | HSP90B1      | 92 kDa           | ★                          | 0.4                     | 5   | 2          | 4      | 4      | 7    |
|   |          |          | Cluster of ADP-ribosylation factor 3 OS=Homo sapiens OX=9606 GN=ARF3 PE=1 SV=2 (P61204)                        |                     |  |  |  |  | ..               | ARF3         | 21 kDa           | ★                          | 0.2                     | 7   | 1          | 2      | 3      | 4    |
|   |          |          | Annexin A6 OS=Homo sapiens OX=9606 GN=ANXA6 PE=1 SV=3                                                          |                     |  |  |  |  | ..               | ANXA6        | 76 kDa           |                            | 1.1                     | 2   | 4          | 6      | 2      | 8    |
|   |          |          | Triosephosphate isomerase OS=Homo sapiens OX=9606 GN=TPI1 PE=1 SV=4                                            |                     |  |  |  |  | ..               | TPI1         | 27 kDa           |                            | 0.9                     | 2   | 1          | 4      | 3      | 9    |
|   |          |          | Protein S100-A11 OS=Homo sapiens OX=9606 GN=S100A11 PE=1 SV=2                                                  |                     |  |  |  |  | ..               | S100A11      | 12 kDa           |                            | 0.5                     | 3   | 2          | 3      | 4      | 5    |
|   |          |          | Basal cell adhesion molecule OS=Homo sapiens OX=9606 GN=BCAM PE=1 SV=2                                         |                     |  |  |  |  | ..               | BCAM         | 67 kDa           |                            | 0.2                     | 5   | 2          | 2      | 1      | 5    |
|   |          |          | Filamin-B OS=Homo sapiens OX=9606 GN=FLNB PE=1 SV=2                                                            |                     |  |  |  |  | ..               | FLNB         | 278 kDa          | ★                          | 0.4                     | 6   | 3          | 6      | 6      | 9    |
|   |          |          | Elongation factor 2 OS=Homo sapiens OX=9606 GN=EEF2 PE=1 SV=4                                                  |                     |  |  |  |  | ..               | EEF2         | 95 kDa           | ★                          | 1.9                     | 1   | 3          | 3      | 3      | 10   |
|   |          |          | Spectrin beta chain, non-erythrocytic 4 OS=Homo sapiens OX=9606 GN=SPTBN4 PE=1 SV=2                            |                     |  |  |  |  | ..               | SPTBN4       | 289 kDa          | ★                          | 1.0                     | 3   | 6          | 8      | 4      | 10   |
|   |          |          | Cluster of Dihydropyrimidinase-related protein 2 OS=Homo sapiens OX=9606 GN=DPYSL2 PE=1 SV=1 (Q16555)          |                     |  |  |  |  | ..               | DPYSL2       | 62 kDa           | ★                          | 0.2                     | 9   | 0          | 4      | 4      | 6    |



| #  | Visible? | Starred? | Bio View:<br>564 Proteins in 399 Clusters<br>With 7618 Hidden                                                | Probability Legend: |            |            |            |           | Accession Number | Alternate ID | Molecular Weight | Protein Grouping Ambiguity | Fold Change by Category | Con |         |        |        |      | Dokyou Med |  |  |  |  |
|----|----------|----------|--------------------------------------------------------------------------------------------------------------|---------------------|------------|------------|------------|-----------|------------------|--------------|------------------|----------------------------|-------------------------|-----|---------|--------|--------|------|------------|--|--|--|--|
|    |          |          |                                                                                                              | over 95%            | 80% to 94% | 50% to 79% | 20% to 49% | 0% to 19% |                  |              |                  |                            |                         | 1h  | HPV-1-1 | HPV1-2 | HPV1-3 | HPV2 |            |  |  |  |  |
| 1  | ✓        | ★        | Fructose-bisphosphate aldolase A OS=Homo sapiens OX=9606 GN=ALDOA PE=1 SV=2                                  | ..                  | ALDOA      | 39 kDa     | ★          | 0.2       | 7                | 3            | 4                | 2                          | 2                       |     |         |        |        |      |            |  |  |  |  |
| 2  | ✓        | ★        | Fibroblast growth factor 1 OS=Homo sapiens OX=9606 GN=FGF1 PE=1 SV=1                                         | ..                  | FGF1       | 17 kDa     |            | 0.6       | 2                | 2            | 2                | 2                          | 6                       |     |         |        |        |      |            |  |  |  |  |
| 3  | ✓        | ★        | E3 ubiquitin-protein ligase HECTD1 OS=Homo sapiens OX=9606 GN=HECTD1 PE=1 SV=3                               | ..                  | HECTD1     | 289 kDa    |            | 1.4       | 2                | 3            | 4                | 12                         | 6                       |     |         |        |        |      |            |  |  |  |  |
| 4  | ✓        | ★        | Dynein axonemal heavy chain 1 OS=Homo sapiens OX=9606 GN=DNAH1 PE=2 SV=5                                     | ..                  | DNAH1      | 487 kDa    | ★          | 0.9       | 5                | 15           | 11               | 8                          | 7                       |     |         |        |        |      |            |  |  |  |  |
| 5  | ✓        | ★        | Integrin alpha-3 OS=Homo sapiens OX=9606 GN=ITGA3 PE=1 SV=5                                                  | ..                  | ITGA3      | 117 kDa    |            | 0.7       | 3                | 2            | 4                | 9                          | 5                       |     |         |        |        |      |            |  |  |  |  |
| 6  | ✓        | ★        | Cohesin subunit SA-3 OS=Homo sapiens OX=9606 GN=STAG3 PE=1 SV=2                                              | ..                  | STAG3      | 139 kDa    |            | 0.2       | 8                | 5            | 4                | 2                          | 2                       |     |         |        |        |      |            |  |  |  |  |
| 7  | ✓        | ★        | Protein bassoon OS=Homo sapiens OX=9606 GN=BSN PE=1 SV=4                                                     | ..                  | BSN        | 416 kDa    | ★          | 0.9       | 3                | 13           | 3                | 3                          | 6                       |     |         |        |        |      |            |  |  |  |  |
| 8  | ✓        | ★        | Ras GTPase-activating-like protein IQGAP2 OS=Homo sapiens OX=9606 GN=IQGAP2 PE=1 SV=4                        | ..                  | IQGAP2     | 181 kDa    |            | 0.2       | 6                | 3            | 1                | 2                          | 7                       |     |         |        |        |      |            |  |  |  |  |
| 9  | ✓        | ★        | Caldesmon OS=Homo sapiens OX=9606 GN=CALD1 PE=1 SV=3                                                         | ..                  | CALD1      | 93 kDa     |            | 0.08      | 10               | 2            |                  | 1                          | 5                       |     |         |        |        |      |            |  |  |  |  |
| 10 | ✓        | ★        | Cluster of Cofilin-1 OS=Homo sapiens OX=9606 GN=CFL1 PE=1 SV=3 (P23528)                                      | ..                  | CFL1       | 19 kDa     | ★          | 0.4       | 3                | 2            | 3                | 3                          | 2                       |     |         |        |        |      |            |  |  |  |  |
| 11 | ✓        | ★        | L-lactate dehydrogenase B chain OS=Homo sapiens OX=9606 GN=LDHB PE=1 SV=2                                    | ..                  | LDHB       | 37 kDa     |            | 0.6       | 2                | 1            | 1                | 5                          | 5                       |     |         |        |        |      |            |  |  |  |  |
| 12 | ✓        | ★        | Integrin beta-1 OS=Homo sapiens OX=9606 GN=ITGB1 PE=1 SV=2                                                   | ..                  | ITGB1      | 88 kDa     |            | 0.2       | 6                | 1            | 2                | 1                          | 6                       |     |         |        |        |      |            |  |  |  |  |
| 13 | ✓        | ★        | EH domain-containing protein 3 OS=Homo sapiens OX=9606 GN=EHD3 PE=1 SV=2                                     | ..                  | EHD3       | 61 kDa     | ★          | 0.2       | 6                | 3            | 2                | 1                          | 6                       |     |         |        |        |      |            |  |  |  |  |
| 14 | ✓        | ★        | Cluster of Myosin light chain 1/3, skeletal muscle isoform OS=Homo sapiens OX=9606 GN=MYL1 PE=1 SV=3 (P05... | ..                  | MYL1       | 21 kDa     | ★          | 0.2       | 6                | 3            | 3                | 3                          | 2                       |     |         |        |        |      |            |  |  |  |  |
| 15 | ✓        | ★        | Complement factor H-related protein 5 OS=Homo sapiens OX=9606 GN=CFHR5 PE=1 SV=1                             | ..                  | CFHR5      | 64 kDa     |            | INF       |                  | 2            | 4                | 4                          | 5                       |     |         |        |        |      |            |  |  |  |  |
| 16 | ✓        | ★        | Epiplakin OS=Homo sapiens OX=9606 GN=EPPK1 PE=1 SV=3                                                         | ..                  | EPPK1      | 556 kDa    | ★          | 3.1       | 1                | 3            | 8                | 7                          | 11                      |     |         |        |        |      |            |  |  |  |  |
| 17 | ✓        | ★        | Caspase recruitment domain-containing protein 11 OS=Homo sapiens OX=9606 GN=CARD11 PE=1 SV=3                 | ..                  | CARD11     | 133 kDa    |            | INF       |                  | 3            | 8                | 3                          | 2                       |     |         |        |        |      |            |  |  |  |  |
| 18 | ✓        | ★        | Cluster of Ras-related protein R-Ras OS=Homo sapiens OX=9606 GN=RRAS PE=1 SV=1 (P10301)                      | ..                  | RRAS       | 23 kDa     | ★          | 0.2       | 5                | 1            | 2                | 2                          | 2                       |     |         |        |        |      |            |  |  |  |  |
| 19 | ✓        | ★        | Filamin-C OS=Homo sapiens OX=9606 GN=FLNC PE=1 SV=3                                                          | ..                  | FLNC       | 291 kDa    | ★          | 0.7       | 4                | 8            | 5                | 8                          | 5                       |     |         |        |        |      |            |  |  |  |  |
| 20 | ✓        | ★        | Serotransferrin OS=Homo sapiens OX=9606 GN=TF PE=1 SV=3                                                      | ..                  | TF         | 77 kDa     |            | 1.7       | 1                | 3            | 4                | 3                          | 6                       |     |         |        |        |      |            |  |  |  |  |
| 21 | ✓        | ★        | Cathepsin D OS=Homo sapiens OX=9606 GN=CTSD PE=1 SV=1                                                        | ..                  | CTSD       | 45 kDa     |            | INF       |                  | 2            | 3                | 1                          | 5                       |     |         |        |        |      |            |  |  |  |  |
| 22 | ✓        | ★        | L-lactate dehydrogenase A chain OS=Homo sapiens OX=9606 GN=LDHA PE=1 SV=2                                    | ..                  | LDHA       | 37 kDa     |            | 0.07      | 7                |              | 1                | 1                          | 3                       |     |         |        |        |      |            |  |  |  |  |
| 23 | ✓        | ★        | Microtubule-associated protein 9 OS=Homo sapiens OX=9606 GN=MAP9 PE=1 SV=3                                   | ..                  | MAP9       | 74 kDa     |            | INF       |                  | 3            | 9                | 5                          | 10                      |     |         |        |        |      |            |  |  |  |  |
| 24 | ✓        | ★        | Plastin-3 OS=Homo sapiens OX=9606 GN=PLS3 PE=1 SV=4                                                          | ..                  | PLS3       | 71 kDa     | ★          | 0.8       | 2                | 2            | 4                | 3                          | 6                       |     |         |        |        |      |            |  |  |  |  |
| 25 | ✓        | ★        | F-box only protein 50 OS=Homo sapiens OX=9606 GN=NCCRP1 PE=1 SV=1                                            | ..                  | NCCRP1     | 31 kDa     |            | INF       |                  | 2            | 1                | 3                          | 6                       |     |         |        |        |      |            |  |  |  |  |
| 26 | ✓        | ★        | Cluster of Actin-related protein 3 OS=Homo sapiens OX=9606 GN=ACTR3 PE=1 SV=3 (P61158)                       | ..                  | ACTR3      | 47 kDa     | ★          | 0.07      | 8                |              | 1                |                            | 5                       |     |         |        |        |      |            |  |  |  |  |
| 27 | ✓        | ★        | Cluster of Rab GDP dissociation inhibitor beta OS=Homo sapiens OX=9606 GN=GDI2 PE=1 SV=2 (P50395)            | ..                  | GDI2       | 51 kDa     | ★          | 0.3       | 4                | 3            | 1                | 4                          | 5                       |     |         |        |        |      |            |  |  |  |  |
| 28 | ✓        | ★        | Septin-2 OS=Homo sapiens OX=9606 GN=SEPTIN2 PE=1 SV=1                                                        | ..                  | SEPTIN2    | 41 kDa     |            | 0.3       | 3                | 2            | 3                | 1                          | 3                       |     |         |        |        |      |            |  |  |  |  |
| 29 | ✓        | ★        | Cytosolic non-specific dipeptidase OS=Homo sapiens OX=9606 GN=CNDP2 PE=1 SV=2                                | ..                  | CNDP2      | 53 kDa     |            | 0.4       | 3                |              | 3                | 3                          | 5                       |     |         |        |        |      |            |  |  |  |  |

| # | Visible? | Starred? |                                                                                                               | Probability Legend: |  |  |  |  | Accession Number | Alternate ID | Molecular Weight | Protein Grouping Ambiguity | Fold Change by Category | Con | Dokyou Med |        |        |      |
|---|----------|----------|---------------------------------------------------------------------------------------------------------------|---------------------|--|--|--|--|------------------|--------------|------------------|----------------------------|-------------------------|-----|------------|--------|--------|------|
|   |          |          |                                                                                                               |                     |  |  |  |  |                  |              |                  |                            |                         | 1h  | HPV-1-1    | HPV1-2 | HPV1-3 | HPV2 |
|   |          |          | <b>Bio View:</b><br>564 Proteins in 399 Clusters<br>With 7618 Hidden                                          |                     |  |  |  |  |                  |              |                  |                            |                         |     |            |        |        |      |
|   |          |          | Q08554                                                                                                        |                     |  |  |  |  | ..               | DSC1         | 100 kDa          |                            | INF                     |     | 3          | 2      | 1      | 10   |
|   |          |          | Talin-2 OS=Homo sapiens OX=9606 GN=TLN2 PE=1 SV=4                                                             |                     |  |  |  |  | ..               | TLN2         | 272 kDa          | ★                          | 0.4                     | 5   | 3          | 1      |        | 15   |
|   |          |          | Catalase OS=Homo sapiens OX=9606 GN=CAT PE=1 SV=3                                                             |                     |  |  |  |  | ..               | CAT          | 60 kDa           |                            | INF                     | 0   | 2          | 4      |        | 6    |
|   |          |          | Serpin A12 OS=Homo sapiens OX=9606 GN=SERPINA12 PE=1 SV=1                                                     |                     |  |  |  |  | ..               | SERPIN...    | 47 kDa           |                            | 0.1                     | 16  | 4          | 10     | 2      | 3    |
|   |          |          | Transmembrane protein KIAA1109 OS=Homo sapiens OX=9606 GN=KIAA1109 PE=1 SV=2                                  |                     |  |  |  |  | ..               | KIAA11...    | 555 kDa          |                            | 1.1                     | 3   | 3          | 20     | 3      | 4    |
|   |          |          | Chloride intracellular channel protein 1 OS=Homo sapiens OX=9606 GN=CLIC1 PE=1 SV=4                           |                     |  |  |  |  | ..               | CLIC1        | 27 kDa           |                            | 1.1                     | 1   | 3          | 3      |        | 4    |
|   |          |          | Cytoplasmic dynein 1 heavy chain 1 OS=Homo sapiens OX=9606 GN=DYNC1H1 PE=1 SV=5                               |                     |  |  |  |  | ..               | DYNC1...     | 532 kDa          |                            | 1.2                     | 2   | 1          | 5      | 0      | 18   |
|   |          |          | Fibrinogen alpha chain OS=Homo sapiens OX=9606 GN=FGA PE=1 SV=2                                               |                     |  |  |  |  | ..               | FGA          | 95 kDa           |                            | INF                     |     | 1          | 2      | 3      | 7    |
|   |          |          | Integrin-linked protein kinase OS=Homo sapiens OX=9606 GN=ILK PE=1 SV=2                                       |                     |  |  |  |  | ..               | ILK          | 51 kDa           |                            | 0.2                     | 4   | 2          | 1      | 1      | 2    |
|   |          |          | Tubulin polymerization-promoting protein family member 3 OS=Homo sapiens OX=9606 GN=TPPP3 PE=1 SV=1           |                     |  |  |  |  | ..               | TPPP3        | 19 kDa           |                            | 0.5                     | 2   | 2          | 2      | 2      | 3    |
|   |          |          | Actin-related protein 2/3 complex subunit 4 OS=Homo sapiens OX=9606 GN=ARPC4 PE=1 SV=3                        |                     |  |  |  |  | ..               | ARPC4        | 20 kDa           |                            | 0.2                     | 4   | 1          | 2      | 3      | 3    |
|   |          |          | Prolow-density lipoprotein receptor-related protein 1 OS=Homo sapiens OX=9606 GN=LRP1 PE=1 SV=2               |                     |  |  |  |  | ..               | LRP1         | 505 kDa          |                            | 0.5                     | 4   | 5          | 3      | 6      | 5    |
|   |          |          | Cluster of Core histone macro-H2A.1 OS=Homo sapiens OX=9606 GN=MACROH2A1 PE=1 SV=4 (O75367)                   |                     |  |  |  |  | ..               | MACRO...     | 40 kDa           | ★                          | 0.3                     | 3   | 1          | 2      | 1      | 4    |
|   |          |          | Ras-related protein Rab-7a OS=Homo sapiens OX=9606 GN=RAB7A PE=1 SV=1                                         |                     |  |  |  |  | ..               | RAB7A        | 23 kDa           |                            | INF                     |     | 2          | 2      | 1      | 3    |
|   |          |          | Ubiquitin-like modifier-activating enzyme 1 OS=Homo sapiens OX=9606 GN=UBA1 PE=1 SV=3                         |                     |  |  |  |  | ..               | UBA1         | 118 kDa          |                            | 0.1                     | 6   | 1          |        | 4      | 3    |
|   |          |          | Protein disulfide-isomerase A3 OS=Homo sapiens OX=9606 GN=PDIA3 PE=1 SV=4                                     |                     |  |  |  |  | ..               | PDIA3        | 57 kDa           |                            | 0.1                     | 6   | 1          |        | 3      | 3    |
|   |          |          | Nesprin-1 OS=Homo sapiens OX=9606 GN=SYNE1 PE=1 SV=4                                                          |                     |  |  |  |  | ..               | SYNE1        | 1011 kDa         | ★                          | 0.8                     | 6   | 17         | 7      | 9      | 14   |
|   |          |          | Dynein axonemal heavy chain 9 OS=Homo sapiens OX=9606 GN=DNAH9 PE=1 SV=3                                      |                     |  |  |  |  | ..               | DNAH9        | 512 kDa          | ★                          | 2.9                     | 1   | 9          | 6      | 5      | 7    |
|   |          |          | Nesprin-2 OS=Homo sapiens OX=9606 GN=SYNE2 PE=1 SV=3                                                          |                     |  |  |  |  | ..               | SYNE2        | 796 kDa          | ★                          | 1.9                     | 1   | 1          | 3      | 3      | 12   |
|   |          |          | Cluster of ADP/ATP translocase 2 OS=Homo sapiens OX=9606 GN=SLC25A5 PE=1 SV=7 (P05141)                        |                     |  |  |  |  | ..               | SLC25A5      | 33 kDa           | ★                          | INF                     | 0   | 4          | 1      | 3      | 5    |
|   |          |          | Phosphatidylethanolamine-binding protein 1 OS=Homo sapiens OX=9606 GN=PEBP1 PE=1 SV=3                         |                     |  |  |  |  | ..               | PEBP1        | 21 kDa           |                            | 1.0                     | 1   | 2          | 3      | 1      | 3    |
|   |          |          | Serine/threonine-protein kinase Nek10 OS=Homo sapiens OX=9606 GN=NEK10 PE=1 SV=3                              |                     |  |  |  |  | ..               | NEK10        | 133 kDa          |                            | 0.2                     | 8   | 3          | 4      | 2      | 3    |
|   |          |          | Reticulon-4 OS=Homo sapiens OX=9606 GN=RTN4 PE=1 SV=2                                                         |                     |  |  |  |  | ..               | RTN4         | 130 kDa          |                            | 0.3                     | 3   | 5          | 1      |        | 3    |
|   |          |          | Apolipoprotein A-I OS=Homo sapiens OX=9606 GN=APOA1 PE=1 SV=1                                                 |                     |  |  |  |  | ..               | APOA1        | 31 kDa           |                            | INF                     |     | 1          | 2      | 1      | 5    |
|   |          |          | Cluster of Guanine nucleotide-binding protein G(s) subunit alpha isoforms XLas OS=Homo sapiens OX=9606 GN=... |                     |  |  |  |  | ..               | GNAS         | 111 kDa          | ★                          | 0.8                     | 2   | 1          | 2      | 2      | 12   |
|   |          |          | Dynein axonemal heavy chain 2 OS=Homo sapiens OX=9606 GN=DNAH2 PE=1 SV=3                                      |                     |  |  |  |  | ..               | DNAH2        | 508 kDa          |                            | 0.2                     | 16  | 8          | 4      | 1      | 11   |
|   |          |          | Histone H1.0 OS=Homo sapiens OX=9606 GN=H1-0 PE=1 SV=3                                                        |                     |  |  |  |  | ..               | H1-0         | 21 kDa           |                            | 1.0                     | 1   | 3          | 2      | 1      | 3    |
|   |          |          | Transcription factor HIVEP2 OS=Homo sapiens OX=9606 GN=HIVEP2 PE=1 SV=2                                       |                     |  |  |  |  | ..               | HIVEP2       | 269 kDa          | ★                          | 2.5                     | 1   | 5          | 9      | 5      | 3    |
|   |          |          | Septin-7 OS=Homo sapiens OX=9606 GN=SEPTIN7 PE=1 SV=2                                                         |                     |  |  |  |  | ..               | SEPTIN7      | 51 kDa           | ★                          | 0.7                     | 1   | 2          | 1      | 0      | 4    |

| # | Visible? | Starred? | Bio View:<br>564 Proteins in 399 Clusters<br>With 7618 Hidden                                                 | Probability Legend: |            |            |            |           | Accession Number | Alternate ID | Molecular Weight | Protein Grouping Ambiguity | Fold Change by Category | Dokyou Med |         |        |        |      |
|---|----------|----------|---------------------------------------------------------------------------------------------------------------|---------------------|------------|------------|------------|-----------|------------------|--------------|------------------|----------------------------|-------------------------|------------|---------|--------|--------|------|
|   |          |          |                                                                                                               | over 95%            | 80% to 94% | 50% to 79% | 20% to 49% | 0% to 19% |                  |              |                  |                            |                         | Con        | HPV-1-1 | HPV1-2 | HPV1-3 | HPV2 |
|   |          |          | Histone-lysine N-methyltransferase, H3 lysine-79 specific OS=Homo sapiens OX=9606 GN=DOT1L PE=1 SV=3          |                     |            |            |            |           | ..               | DOT1L        | 165 kDa          |                            | INF                     |            |         | 1      |        | 12   |
|   |          |          | Microtubule-actin cross-linking factor 1, isoforms 1/2/3/5 OS=Homo sapiens OX=9606 GN=MACF1 PE=1 SV=4         |                     |            |            |            |           | ..               | MACF1        | 838 kDa          | ★                          | 0.6                     | 6          | 4       | 9      | 4      | 15   |
|   |          |          | Polypyrimidine tract-binding protein 1 OS=Homo sapiens OX=9606 GN=PTBP1 PE=1 SV=1                             |                     |            |            |            |           | ..               | PTBP1        | 57 kDa           | ★                          | 0.4                     | 2          | 2       | 1      |        | 5    |
|   |          |          | Histone-lysine N-methyltransferase 2D OS=Homo sapiens OX=9606 GN=KMT2D PE=1 SV=2                              |                     |            |            |            |           | ..               | KMT2D        | 593 kDa          | ★                          | 1.0                     | 2          | 1       | 1      | 6      | 12   |
|   |          |          | Heat shock protein 75 kDa, mitochondrial OS=Homo sapiens OX=9606 GN=TRAP1 PE=1 SV=3                           |                     |            |            |            |           | ..               | TRAP1        | 80 kDa           |                            | 1.2                     | 1          | 2       |        | 5      | 4    |
|   |          |          | Cluster of Septin-11 OS=Homo sapiens OX=9606 GN=SEPTIN11 PE=1 SV=3 (Q9NVA2)                                   |                     |            |            |            |           | ..               | SEPTIN11     | 49 kDa           | ★                          | 0.3                     | 2          |         | 3      | 3      | 0    |
|   |          |          | ADP-ribosylation factor 6 OS=Homo sapiens OX=9606 GN=ARF6 PE=1 SV=2                                           |                     |            |            |            |           | ..               | ARF6         | 20 kDa           |                            | 0.7                     | 1          | 1       | 3      |        | 3    |
|   |          |          | Annexin A4 OS=Homo sapiens OX=9606 GN=ANXA4 PE=1 SV=4                                                         |                     |            |            |            |           | ..               | ANXA4        | 36 kDa           |                            | INF                     | 0          | 1       |        |        | 5    |
|   |          |          | Cluster of Phosphatidylinositol-binding clathrin assembly protein OS=Homo sapiens OX=9606 GN=PICALM PE=1 SV=1 |                     |            |            |            |           | ..               | PICALM       | 71 kDa           | ★                          | 0.8                     | 1          | 2       | 1      | 2      | 3    |
|   |          |          | Treacle protein OS=Homo sapiens OX=9606 GN=TCOF1 PE=1 SV=3                                                    |                     |            |            |            |           | ..               | TCOF1        | 152 kDa          |                            | INF                     | 0          | 6       | 2      | 4      | 2    |
|   |          |          | Heterogeneous nuclear ribonucleoprotein U OS=Homo sapiens OX=9606 GN=HNRNPU PE=1 SV=6                         |                     |            |            |            |           | ..               | HNRNPU       | 91 kDa           |                            | 0.3                     | 2          | 2       | 3      |        | 1    |
|   |          |          | LIM and SH3 domain protein 1 OS=Homo sapiens OX=9606 GN=LASP1 PE=1 SV=2                                       |                     |            |            |            |           | ..               | LASP1        | 30 kDa           |                            | 0.6                     | 1          |         | 1      | 2      | 3    |
|   |          |          | Centromere-associated protein E OS=Homo sapiens OX=9606 GN=CENPE PE=1 SV=2                                    |                     |            |            |            |           | ..               | CENPE        | 316 kDa          | ★                          | 0.7                     | 2          | 5       | 4      | 0      | 5    |
|   |          |          | Cluster of Trypsin-1 OS=Homo sapiens OX=9606 GN=PRSS1 PE=1 SV=1 (P07477)                                      |                     |            |            |            |           | ..               | PRSS1        | 27 kDa           | ★                          | 0.6                     | 1          |         | 1      | 2      | 3    |
|   |          |          | Golgin subfamily B member 1 OS=Homo sapiens OX=9606 GN=GOLGB1 PE=1 SV=2                                       |                     |            |            |            |           | ..               | GOLGB1       | 376 kDa          |                            | INF                     | 0          | 2       | 1      | 2      | 10   |
|   |          |          | Poly(rC)-binding protein 1 OS=Homo sapiens OX=9606 GN=PCBP1 PE=1 SV=2                                         |                     |            |            |            |           | ..               | PCBP1        | 37 kDa           |                            | 0.1                     | 3          | 1       | 1      | 1      | 1    |
|   |          |          | Kinesin-like protein KIF14 OS=Homo sapiens OX=9606 GN=KIF14 PE=1 SV=1                                         |                     |            |            |            |           | ..               | KIF14        | 186 kDa          |                            | 0.2                     | 3          | 2       | 3      | 0      | 1    |
|   |          |          | Malate dehydrogenase, cytoplasmic OS=Homo sapiens OX=9606 GN=MDH1 PE=1 SV=4                                   |                     |            |            |            |           | ..               | MDH1         | 36 kDa           |                            | INF                     | 0          | 1       | 3      | 2      | 3    |
|   |          |          | Protocadherin Fat 1 OS=Homo sapiens OX=9606 GN=FAT1 PE=1 SV=2                                                 |                     |            |            |            |           | ..               | FAT1         | 506 kDa          |                            | 0.3                     | 3          | 1       | 0      | 2      | 7    |
|   |          |          | Nucleosome-remodeling factor subunit BPTF OS=Homo sapiens OX=9606 GN=BPTF PE=1 SV=3                           |                     |            |            |            |           | ..               | BPTF         | 338 kDa          |                            | 1.4                     | 1          | 2       | 8      | 2      | 0    |
|   |          |          | Transitional endoplasmic reticulum ATPase OS=Homo sapiens OX=9606 GN=VCP PE=1 SV=4                            |                     |            |            |            |           | ..               | VCP          | 89 kDa           |                            | INF                     |            | 0       | 5      | 4      | 4    |
|   |          |          | PDZ and LIM domain protein 5 OS=Homo sapiens OX=9606 GN=PDLIM5 PE=1 SV=5                                      |                     |            |            |            |           | ..               | PDLIM5       | 64 kDa           |                            | 0.2                     | 2          |         |        | 1      | 4    |
|   |          |          | Proteasome subunit alpha type-6 OS=Homo sapiens OX=9606 GN=PSMA6 PE=1 SV=1                                    |                     |            |            |            |           | ..               | PSMA6        | 27 kDa           |                            | INF                     |            | 1       | 1      |        | 3    |
|   |          |          | Chloride intracellular channel protein 5 OS=Homo sapiens OX=9606 GN=CLIC5 PE=1 SV=3                           |                     |            |            |            |           | ..               | CLIC5        | 47 kDa           | ★                          | 0.1                     | 3          |         | 1      |        | 3    |
|   |          |          | Transgelin OS=Homo sapiens OX=9606 GN=TAGLN PE=1 SV=4                                                         |                     |            |            |            |           | ..               | TAGLN        | 23 kDa           |                            | 0.2                     | 3          | 1       |        |        | 5    |
|   |          |          | Mucin-16 OS=Homo sapiens OX=9606 GN=MUC16 PE=1 SV=3                                                           |                     |            |            |            |           | ..               | MUC16        | 1519 kDa         |                            | 1.0                     | 2          | 14      | 2      | 1      | 1    |
|   |          |          | Fermitin family homolog 2 OS=Homo sapiens OX=9606 GN=FERMT2 PE=1 SV=1                                         |                     |            |            |            |           | ..               | FERMT2       | 78 kDa           | ★                          | 0.4                     | 2          |         | 2      | 1      | 5    |
|   |          |          | Ninein-like protein OS=Homo sapiens OX=9606 GN=NINL PE=1 SV=2                                                 |                     |            |            |            |           | ..               | NINL         | 156 kDa          |                            | INF                     |            |         | 2      | 3      | 6    |
|   |          |          | Transforming growth factor beta-1-induced transcript 1 protein OS=Homo sapiens OX=9606 GN=TGFB11I PE=1 SV=1   |                     |            |            |            |           | ..               | TGFB11I      | 50 kDa           |                            | 0.6                     | 1          |         | 1      |        | 5    |



| # | Visible? | Starred? | Bio View:<br>564 Proteins in 399 Clusters<br>With 7618 Hidden                                              | Probability Legend: |            |            |            |           | Accession Number | Alternate ID | Molecular Weight | Protein Grouping Ambiguity | Fold Change by Category | Con | Dokyou Med |        |        |      |
|---|----------|----------|------------------------------------------------------------------------------------------------------------|---------------------|------------|------------|------------|-----------|------------------|--------------|------------------|----------------------------|-------------------------|-----|------------|--------|--------|------|
|   |          |          |                                                                                                            | over 95%            | 80% to 94% | 50% to 79% | 20% to 49% | 0% to 19% |                  |              |                  |                            |                         | 1h  | HPV-1-1    | HPV1-2 | HPV1-3 | HPV2 |
|   |          |          | Dolichyl-diphosphooligosaccharide--protein glycosyltransferase subunit 1 OS=Homo sapiens OX=9606 GN=RPN1   | .....               | RPN1       | 69 kDa     |            | 0.2       | 2                | 0            |                  |                            |                         |     |            |        | 1      | 4    |
|   |          |          | Collagen alpha-1(I) chain OS=Homo sapiens OX=9606 GN=COL1A1 PE=1 SV=5                                      |                     | COL1A1     | 139 kDa    | ★          | 0.4       | 3                |              |                  |                            |                         |     |            |        |        | 12   |
|   |          |          | Unconventional myosin-Ib OS=Homo sapiens OX=9606 GN=MYO1B PE=1 SV=3                                        |                     | MYO1B      | 132 kDa    |            | INF       |                  | 0            |                  |                            |                         |     |            |        | 0      | 10   |
|   |          |          | Nebulin OS=Homo sapiens OX=9606 GN=NEB PE=1 SV=5                                                           |                     | NEB        | 773 kDa    |            | 0.9       | 3                | 3            | 3                |                            |                         |     |            |        | 10     | 10   |
|   |          |          | Unconventional myosin-XV OS=Homo sapiens OX=9606 GN=MYO15A PE=1 SV=2                                       |                     | MYO15A     | 395 kDa    |            | 0.7       | 3                | 5            | 9                |                            |                         |     |            |        | 2      | 2    |
|   |          |          | Nebulette OS=Homo sapiens OX=9606 GN=NEBL PE=1 SV=1                                                        |                     | NEBL       | 116 kDa    |            | 0.6       | 2                | 5            |                  |                            |                         |     |            |        | 4      | 2    |
|   |          |          | Protein PRRC2C OS=Homo sapiens OX=9606 GN=PRRC2C PE=1 SV=4                                                 |                     | PRRC2C     | 317 kDa    | ★          | 0.5       | 4                | 3            | 2                |                            |                         |     |            |        | 10     | 2    |
|   |          |          | SH3 domain-binding glutamic acid-rich-like protein 2 OS=Homo sapiens OX=9606 GN=SH3BGR1 PE=1 SV=2          |                     | SH3BGR...  | 12 kDa     |            | 0.4       | 1                |              | 1                |                            |                         |     |            |        | 1      | 2    |
|   |          |          | Purine nucleoside phosphorylase OS=Homo sapiens OX=9606 GN=PNP PE=1 SV=2                                   |                     | PNP        | 32 kDa     |            | INF       |                  |              | 1                |                            |                         |     |            |        |        | 3    |
|   |          |          | Very long-chain specific acyl-CoA dehydrogenase, mitochondrial OS=Homo sapiens OX=9606 GN=ACADVL PE=1 SV=2 |                     | ACADVL     | 70 kDa     |            | INF       | 0                | 1            | 1                |                            |                         |     |            |        |        | 2    |
|   |          |          | Nuclear receptor corepressor 2 OS=Homo sapiens OX=9606 GN=NCOR2 PE=1 SV=3                                  |                     | NCOR2      | 274 kDa    | ★          | 0.5       | 2                | 1            | 4                |                            |                         |     |            |        |        | 4    |
|   |          |          | Fibulin-1 OS=Homo sapiens OX=9606 GN=FBLN1 PE=1 SV=4                                                       |                     | FBLN1      | 77 kDa     |            | 0.5       | 1                | 2            | 1                |                            |                         |     |            |        |        | 2    |
|   |          |          | Ras GTPase-activating-like protein IQGAP1 OS=Homo sapiens OX=9606 GN=IQGAP1 PE=1 SV=1                      |                     | IQGAP1     | 189 kDa    |            | 0.6       | 1                | 2            | 0                |                            |                         |     |            |        | 0      | 4    |
|   |          |          | Cluster of 60S acidic ribosomal protein P0 OS=Homo sapiens OX=9606 GN=RPLP0 PE=1 SV=1 (P05388)             |                     | RPLP0      | 34 kDa     | ★          | INF       | 0                | 1            |                  |                            |                         |     |            |        | 1      | 3    |
|   |          |          | Tenascin OS=Homo sapiens OX=9606 GN=TNC PE=1 SV=3                                                          |                     | TNC        | 241 kDa    |            | INF       |                  |              | 1                |                            |                         |     |            |        | 1      | 6    |
|   |          |          | Collagen alpha-1(VII) chain OS=Homo sapiens OX=9606 GN=COL7A1 PE=1 SV=2                                    |                     | COL7A1     | 295 kDa    |            | 0.3       | 3                |              | 0                |                            |                         |     |            |        |        | 10   |
|   |          |          | Alstrom syndrome protein 1 OS=Homo sapiens OX=9606 GN=ALMS1 PE=1 SV=4                                      |                     | ALMS1      | 461 kDa    |            | 1.7       | 1                | 11           | 2                |                            |                         |     |            |        | 1      | 1    |
|   |          |          | G protein-regulated inducer of neurite outgrowth 1 OS=Homo sapiens OX=9606 GN=GPRIN1 PE=1 SV=2             |                     | GPRIN1     | 102 kDa    |            | 1.2       | 1                |              | 2                |                            |                         |     |            |        | 7      | 2    |
|   |          |          | Extracellular matrix protein 1 OS=Homo sapiens OX=9606 GN=ECM1 PE=1 SV=2                                   |                     | ECM1       | 61 kDa     |            | INF       | 0                | 1            |                  |                            |                         |     |            |        | 1      | 4    |
|   |          |          | Thioredoxin-dependent peroxide reductase, mitochondrial OS=Homo sapiens OX=9606 GN=PRDX3 PE=1 SV=3         |                     | PRDX3      | 28 kDa     |            | 0.10      | 3                |              | 1                |                            |                         |     |            |        |        | 2    |
|   |          |          | 40S ribosomal protein S3 OS=Homo sapiens OX=9606 GN=RPS3 PE=1 SV=2                                         |                     | RPS3       | 27 kDa     |            | INF       |                  |              | 0                |                            |                         |     |            |        | 1      | 3    |
|   |          |          | Bromodomain and WD repeat-containing protein 1 OS=Homo sapiens OX=9606 GN=BRWD1 PE=1 SV=4                  |                     | BRWD1      | 263 kDa    |            | 0.3       | 2                | 1            |                  |                            |                         |     |            |        |        | 6    |
|   |          |          | Glutamyl aminopeptidase OS=Homo sapiens OX=9606 GN=ENPEP PE=1 SV=3                                         |                     | ENPEP      | 109 kDa    |            | INF       |                  |              | 2                |                            |                         |     |            |        |        | 6    |
|   |          |          | Prohibitin OS=Homo sapiens OX=9606 GN=PHB PE=1 SV=1                                                        |                     | PHB        | 30 kDa     |            | INF       |                  |              |                  |                            |                         |     |            |        | 2      | 4    |
|   |          |          | Transforming growth factor-beta-induced protein ig-h3 OS=Homo sapiens OX=9606 GN=TGFBI PE=1 SV=1           |                     | TGFBI      | 75 kDa     |            | 0.1       | 2                |              |                  |                            |                         |     |            |        |        | 3    |
|   |          |          | Proteasome subunit beta type-3 OS=Homo sapiens OX=9606 GN=PSMB3 PE=1 SV=2                                  |                     | PSMB3      | 23 kDa     |            | INF       |                  |              |                  |                            |                         |     |            |        | 1      | 3    |
|   |          |          | NLR family member X1 OS=Homo sapiens OX=9606 GN=NLRX1 PE=1 SV=1                                            |                     | NLRX1      | 108 kDa    |            | INF       |                  |              | 1                |                            |                         |     |            |        |        | 3    |
|   |          |          | 6-phosphogluconate dehydrogenase, decarboxylating OS=Homo sapiens OX=9606 GN=PGD PE=1 SV=3                 |                     | PGD        | 53 kDa     |            | 0.09      | 2                |              |                  |                            |                         |     |            |        |        | 2    |
|   |          |          | F-actin-capping protein subunit beta OS=Homo sapiens OX=9606 GN=CAPZB PE=1 SV=4                            |                     | CAPZB      | 31 kDa     |            | INF       |                  |              |                  |                            |                         |     |            |        | 1      | 3    |

| # | Visible? | Starred? |                                                                                                          | Probability Legend: |            |            |            |           | Accession Number | Alternate ID | Molecular Weight | Protein Grouping Ambiguity | Fold Change by Category | Con | Dokyou Med |        |        |      |
|---|----------|----------|----------------------------------------------------------------------------------------------------------|---------------------|------------|------------|------------|-----------|------------------|--------------|------------------|----------------------------|-------------------------|-----|------------|--------|--------|------|
|   |          |          |                                                                                                          | over 95%            | 80% to 94% | 50% to 79% | 20% to 49% | 0% to 19% |                  |              |                  |                            |                         | 1h  | HPV-1-1    | HPV1-2 | HPV1-3 | HPV2 |
|   |          |          | Bio View:<br>564 Proteins in 399 Clusters<br>With 7618 Hidden                                            |                     |            |            |            |           |                  |              |                  |                            |                         |     |            |        |        |      |
|   |          |          | EH domain-containing protein 4 OS=Homo sapiens OX=9606 GN=EHD4 PE=1 SV=1                                 |                     |            |            |            |           | ..               | EHD4         | 61 kDa           | ★                          | 0.2                     | 3   | 0          | 2      |        | 3    |
|   |          |          | Cluster of Eukaryotic initiation factor 4A-I OS=Homo sapiens OX=9606 GN=EIF4A1 PE=1 SV=1 (P60842)        |                     |            |            |            |           | ..               | EIF4A1       | 46 kDa           | ★                          | 0.4                     | 1   |            |        |        | 4    |
|   |          |          | 60S ribosomal protein L6 OS=Homo sapiens OX=9606 GN=RPL6 PE=1 SV=3                                       |                     |            |            |            |           | ..               | RPL6         | 33 kDa           |                            | INF                     | 0   | 1          |        | 0      | 3    |
|   |          |          | Nephronectin OS=Homo sapiens OX=9606 GN=NPNT PE=2 SV=3                                                   |                     |            |            |            |           | ..               | NPNT         | 62 kDa           |                            | INF                     |     |            | 1      | 0      | 5    |
|   |          |          | Transaldolase OS=Homo sapiens OX=9606 GN=TALDO1 PE=1 SV=2                                                |                     |            |            |            |           | ..               | TALDO1       | 38 kDa           |                            | 0.5                     | 1   |            |        |        | 5    |
|   |          |          | Abnormal spindle-like microcephaly-associated protein OS=Homo sapiens OX=9606 GN=ASPM PE=1 SV=2          |                     |            |            |            |           | ..               | ASPM         | 410 kDa          |                            | 0.8                     | 1   | 1          | 1      | 0      | 6    |
|   |          |          | Cilia- and flagella-associated protein 54 OS=Homo sapiens OX=9606 GN=CFAP54 PE=2 SV=3                    |                     |            |            |            |           | ..               | CFAP54       | 352 kDa          |                            | 0.4                     | 2   | 0          | 1      | 2      | 4    |
|   |          |          | WD repeat and FYVE domain-containing protein 3 OS=Homo sapiens OX=9606 GN=WDFY3 PE=1 SV=2                |                     |            |            |            |           | ..               | WDFY3        | 395 kDa          |                            | INF                     | 0   | 2          | 0      | 1      | 4    |
|   |          |          | Nucleoprotein TPR OS=Homo sapiens OX=9606 GN=TPR PE=1 SV=3                                               |                     |            |            |            |           | ..               | TPR          | 267 kDa          |                            | 0.4                     | 2   | 1          | 1      | 1      | 4    |
|   |          |          | Fibronectin type III domain-containing protein 1 OS=Homo sapiens OX=9606 GN=FNDC1 PE=2 SV=4              |                     |            |            |            |           | ..               | FNDC1        | 206 kDa          | ★                          | INF                     | 0   | 0          | 2      | 5      | 1    |
|   |          |          | Thyroid receptor-interacting protein 11 OS=Homo sapiens OX=9606 GN=TRIP11 PE=1 SV=3                      |                     |            |            |            |           | ..               | TRIP11       | 228 kDa          |                            | 0.7                     | 1   | 0          | 0      | 4      | 3    |
|   |          |          | Pre-mRNA-processing-splicing factor 8 OS=Homo sapiens OX=9606 GN=PRPF8 PE=1 SV=2                         |                     |            |            |            |           | ..               | PRPF8        | 274 kDa          |                            | 0.4                     | 2   | 5          | 2      | 0      |      |
|   |          |          | Envoplakin OS=Homo sapiens OX=9606 GN=EVPL PE=1 SV=3                                                     |                     |            |            |            |           | ..               | EVPL         | 232 kDa          | ★                          | 0.5                     | 2   | 0          | 7      |        | 2    |
|   |          |          | Tenascin-X OS=Homo sapiens OX=9606 GN=TNXB PE=1 SV=5                                                     |                     |            |            |            |           | ..               | TNXB         | 458 kDa          |                            | 0.5                     | 2   |            |        | 3      | 7    |
|   |          |          | Aldo-keto reductase family 1 member A1 OS=Homo sapiens OX=9606 GN=AKR1A1 PE=1 SV=3                       |                     |            |            |            |           | ..               | AKR1A1       | 37 kDa           |                            | 0.1                     | 2   | 1          |        |        | 2    |
|   |          |          | Msx2-interacting protein OS=Homo sapiens OX=9606 GN=SPEN PE=1 SV=1                                       |                     |            |            |            |           | ..               | SPEN         | 402 kDa          |                            | 0.3                     | 3   | 1          | 8      | 0      | 0    |
|   |          |          | Rootletin OS=Homo sapiens OX=9606 GN=CROCC PE=1 SV=1                                                     |                     |            |            |            |           | ..               | CROCC        | 229 kDa          | ★                          | INF                     | 0   | 1          | 1      | 0      | 8    |
|   |          |          | Cluster of NUT family member 2E OS=Homo sapiens OX=9606 GN=NUTM2E PE=3 SV=3 (B1AL46)                     |                     |            |            |            |           | ..               | NUTM2E       | 94 kDa           | ★                          | 0.4                     | 1   |            | 3      | 0      | 1    |
|   |          |          | E3 ubiquitin-protein ligase MYCBP2 OS=Homo sapiens OX=9606 GN=MYCBP2 PE=1 SV=4                           |                     |            |            |            |           | ..               | MYCBP2       | 514 kDa          |                            | 0.3                     | 3   | 0          | 7      |        | 0    |
|   |          |          | Cluster of Complement receptor type 1 OS=Homo sapiens OX=9606 GN=CR1 PE=1 SV=3 (P17927)                  |                     |            |            |            |           | ..               | CR1          | 224 kDa          | ★                          | 0.6                     | 1   |            | 4      |        | 2    |
|   |          |          | Adenylyl cyclase-associated protein 1 OS=Homo sapiens OX=9606 GN=CAP1 PE=1 SV=5                          |                     |            |            |            |           | ..               | CAP1         | 52 kDa           |                            | INF                     |     | 2          | 1      |        | 6    |
|   |          |          | Protein POF1B OS=Homo sapiens OX=9606 GN=POF1B PE=1 SV=3                                                 |                     |            |            |            |           | ..               | POF1B        | 68 kDa           |                            | INF                     |     | 1          | 4      |        | 0    |
|   |          |          | Hemicentin-2 OS=Homo sapiens OX=9606 GN=HMCN2 PE=2 SV=3                                                  |                     |            |            |            |           | ..               | HMCN2        | 542 kDa          |                            | 0.4                     | 3   | 1          | 0      |        | 12   |
|   |          |          | Annexin A7 OS=Homo sapiens OX=9606 GN=ANXA7 PE=1 SV=3                                                    |                     |            |            |            |           | ..               | ANXA7        | 53 kDa           |                            | INF                     |     |            |        | 1      | 3    |
|   |          |          | Fructose-bisphosphate aldolase B OS=Homo sapiens OX=9606 GN=ALDOB PE=1 SV=2                              |                     |            |            |            |           | ..               | ALDOB        | 39 kDa           |                            | 0.2                     | 1   |            |        |        | 2    |
|   |          |          | 60 kDa heat shock protein, mitochondrial OS=Homo sapiens OX=9606 GN=HSPD1 PE=1 SV=2                      |                     |            |            |            |           | ..               | HSPD1        | 61 kDa           |                            | 0.9                     | 1   | 3          |        | 0      | 6    |
|   |          |          | Proteasome subunit beta type-4 OS=Homo sapiens OX=9606 GN=PSMB4 PE=1 SV=4                                |                     |            |            |            |           | ..               | PSMB4        | 29 kDa           |                            | 0.3                     | 1   |            |        | 1      | 2    |
|   |          |          | Cluster of Sodium/potassium-transporting ATPase subunit alpha-1 OS=Homo sapiens OX=9606 GN=ATP1A1 PE=... |                     |            |            |            |           | ..               | ATP1A1       | 113 kDa          | ★                          | 0.2                     | 3   |            | 1      |        | 4    |
|   |          |          | Tropomodulin-3 OS=Homo sapiens OX=9606 GN=TMOD3 PE=1 SV=1                                                |                     |            |            |            |           | ..               | TMOD3        | 40 kDa           |                            | INF                     |     | 0          | 2      |        | 2    |

| #  | Visible? | Starred? | Bio View:<br>564 Proteins in 399 Clusters<br>With 7618 Hidden                               | Probability Legend: |            |            |            |           | Accession Number | Alternate ID | Molecular Weight | Protein Grouping Ambiguity | Fold Change by Category | Con | Dokyou Med |         |         |      |
|----|----------|----------|---------------------------------------------------------------------------------------------|---------------------|------------|------------|------------|-----------|------------------|--------------|------------------|----------------------------|-------------------------|-----|------------|---------|---------|------|
|    |          |          |                                                                                             | over 95%            | 80% to 94% | 50% to 79% | 20% to 49% | 0% to 19% |                  |              |                  |                            |                         | 1h  | HPV- 1-1   | HPV1- 2 | HPV1- 3 | HPV2 |
| 1  | ✓        | ★        | Hydrocephalus-inducing protein homolog OS=Homo sapiens OX=9606 GN=HYDIN PE=1 SV=3           | ...                 | HYDIN      | 576 kDa    |            | INF       | 0                | 0            | 0                |                            |                         |     | 9          |         |         |      |
| 2  | ✓        | ★        | Heterogeneous nuclear ribonucleoprotein R OS=Homo sapiens OX=9606 GN=HNRNPR PE=1 SV=1       | ...                 | HNRNPR     | 71 kDa     | ★          | 0.4       | 1                |              | 1                |                            |                         |     | 3          |         |         |      |
| 3  | ✓        | ★        | Actin-related protein 2 OS=Homo sapiens OX=9606 GN=ACTR2 PE=1 SV=1                          | ...                 | ACTR2      | 45 kDa     |            | INF       |                  |              | 1                |                            |                         |     | 2          |         |         |      |
| 4  | ✓        | ★        | Alpha-parvin OS=Homo sapiens OX=9606 GN=PARVA PE=1 SV=1                                     | ...                 | PARVA      | 42 kDa     | ★          | INF       | 0                |              |                  |                            |                         | 2   | 4          |         |         |      |
| 5  | ✓        | ★        | Carbonic anhydrase 2 OS=Homo sapiens OX=9606 GN=CA2 PE=1 SV=2                               | ...                 | CA2        | 29 kDa     |            | 0.3       | 1                |              |                  |                            |                         |     | 3          |         |         |      |
| 6  | ✓        | ★        | U4/U6.U5 tri-snRNP-associated protein 1 OS=Homo sapiens OX=9606 GN=SART1 PE=1 SV=1          | ...                 | SART1      | 90 kDa     |            | INF       |                  |              | 1                | 4                          |                         |     | 0          |         |         |      |
| 7  | ✓        | ★        | Inverted formin-2 OS=Homo sapiens OX=9606 GN=INF2 PE=1 SV=2                                 | ...                 | INF2       | 136 kDa    |            | INF       |                  | 0            |                  |                            |                         |     | 6          |         |         |      |
| 8  | ✓        | ★        | Acetyl-CoA acetyltransferase, mitochondrial OS=Homo sapiens OX=9606 GN=ACAT1 PE=1 SV=1      | ...                 | ACAT1      | 45 kDa     |            | INF       | 0                |              |                  |                            |                         |     | 3          |         |         |      |
| 9  | ✓        | ★        | Serpin B13 OS=Homo sapiens OX=9606 GN=SERPINB13 PE=1 SV=2                                   | ...                 | SERPIN...  | 44 kDa     |            | INF       | 0                |              |                  |                            |                         |     | 3          |         |         |      |
| 10 | ✓        | ★        | Lysosome-associated membrane glycoprotein 1 OS=Homo sapiens OX=9606 GN=LAMP1 PE=1 SV=3      | ...                 | LAMP1      | 45 kDa     |            | INF       |                  |              |                  |                            |                         |     | 5          |         |         |      |
| 11 | ✓        | ★        | Ras suppressor protein 1 OS=Homo sapiens OX=9606 GN=RSU1 PE=1 SV=3                          | ...                 | RSU1       | 32 kDa     |            | INF       |                  |              |                  |                            |                         |     | 4          |         |         |      |
| 12 | ✓        | ★        | DNA-dependent protein kinase catalytic subunit OS=Homo sapiens OX=9606 GN=PRKDC PE=1 SV=3   | ...                 | PRKDC      | 469 kDa    |            | 0.5       | 4                | 8            | 3                | 2                          |                         |     | 5          |         |         |      |
| 13 | ✓        | ★        | StAR-related lipid transfer protein 9 OS=Homo sapiens OX=9606 GN=STARD9 PE=1 SV=3           | ...                 | STARD9     | 516 kDa    | ★          | 0.8       | 2                | 2            | 7                | 1                          |                         |     | 6          |         |         |      |
| 14 | ✓        | ★        | Dynein axonemal heavy chain 10 OS=Homo sapiens OX=9606 GN=DNAH10 PE=1 SV=4                  | ...                 | DNAH10     | 515 kDa    | ★          | 1.0       | 1                | 4            | 0                | 2                          |                         |     | 4          |         |         |      |
| 15 | ✓        | ★        | Obscurin OS=Homo sapiens OX=9606 GN=OBSCN PE=1 SV=3                                         | ...                 | OBSCN      | 868 kDa    |            | 0.8       | 1                | 1            | 5                | 0                          |                         |     | 1          |         |         |      |
| 16 | ✓        | ★        | Xin actin-binding repeat-containing protein 2 OS=Homo sapiens OX=9606 GN=XIRP2 PE=1 SV=2    | ...                 | XIRP2      | 382 kDa    |            | 0.6       | 1                | 1            | 1                | 2                          |                         |     | 2          |         |         |      |
| 17 | ✓        | ★        | PDZ and LIM domain protein 7 OS=Homo sapiens OX=9606 GN=PDLIM7 PE=1 SV=1                    | ...                 | PDLIM7     | 50 kDa     |            | INF       |                  | 3            | 1                |                            |                         |     | 4          |         |         |      |
| 18 | ✓        | ★        | Cardiomyopathy-associated protein 5 OS=Homo sapiens OX=9606 GN=CMYA5 PE=1 SV=3              | ...                 | CMYA5      | 449 kDa    |            | 0.7       | 1                | 1            | 1                | 1                          |                         |     | 4          |         |         |      |
| 19 | ✓        | ★        | Vacuolar protein sorting-associated protein 13D OS=Homo sapiens OX=9606 GN=VPS13D PE=1 SV=2 | ...                 | VPS13D     | 492 kDa    |            | INF       | 0                | 1            | 3                |                            |                         |     | 6          |         |         |      |
| 20 | ✓        | ★        | Protein AHNAK2 OS=Homo sapiens OX=9606 GN=AHNAK2 PE=1 SV=2                                  | ...                 | AHNAK2     | 617 kDa    |            | INF       | 0                | 1            | 3                |                            |                         |     | 8          |         |         |      |
| 21 | ✓        | ★        | Serine/arginine repetitive matrix protein 2 OS=Homo sapiens OX=9606 GN=SRRM2 PE=1 SV=2      | ...                 | SRRM2      | 300 kDa    | ★          | 0.3       | 4                | 10           | 0                |                            |                         |     | 2          |         |         |      |
| 22 | ✓        | ★        | Dynein axonemal heavy chain 3 OS=Homo sapiens OX=9606 GN=DNAH3 PE=2 SV=1                    | ...                 | DNAH3      | 471 kDa    |            | INF       |                  | 3            | 0                | 0                          |                         |     | 6          |         |         |      |
| 23 | ✓        | ★        | Tudor domain-containing protein 6 OS=Homo sapiens OX=9606 GN=TDRD6 PE=2 SV=2                | ...                 | TDRD6      | 237 kDa    |            | INF       | 0                | 2            | 4                |                            |                         |     | 0          |         |         |      |
| 24 | ✓        | ★        | Ryanodine receptor 2 OS=Homo sapiens OX=9606 GN=RYSR2 PE=1 SV=3                             | ...                 | RYSR2      | 565 kDa    |            | INF       | 0                |              | 1                | 7                          |                         |     | 1          |         |         |      |
| 25 | ✓        | ★        | 26S proteasome non-ATPase regulatory subunit 1 OS=Homo sapiens OX=9606 GN=PSMD1 PE=1 SV=2   | ...                 | PSMD1      | 106 kDa    |            | INF       |                  | 1            |                  |                            |                         |     | 2          |         |         |      |
| 26 | ✓        | ★        | Apolipoprotein B-100 OS=Homo sapiens OX=9606 GN=APOB PE=1 SV=2                              | ...                 | APOB       | 516 kDa    |            | INF       | 0                | 9            |                  | 0                          |                         |     | 0          |         |         |      |
| 27 | ✓        | ★        | Malate dehydrogenase, mitochondrial OS=Homo sapiens OX=9606 GN=MDH2 PE=1 SV=3               | ...                 | MDH2       | 36 kDa     |            | INF       | 0                | 0            | 1                |                            |                         |     | 3          |         |         |      |
| 28 | ✓        | ★        | Heterogeneous nuclear ribonucleoprotein M OS=Homo sapiens OX=9606 GN=HNRNPM PE=1 SV=3       | ...                 | HNRNPM     | 78 kDa     |            | 0.4       | 1                | 1            |                  |                            |                         |     | 3          |         |         |      |
| 29 | ✓        | ★        | ATP-dependent RNA helicase A OS=Homo sapiens OX=9606 GN=DHX9 PE=1 SV=4                      | ...                 | DHX9       | 141 kDa    |            | INF       | 0                |              | 1                |                            |                         |     | 2          |         |         |      |

2022年7月27日 ページ 12 / 13 7:54:35 PM

| # | Visible? | Starred? | Bio View:<br>564 Proteins in 399 Clusters<br>With 7618 Hidden              | Probability Legend: |            |            |            |           | Accession Number | Alternate ID | Molecular Weight | Protein Grouping Ambiguity | Fold Change by Category | Con |         |        |        |      | Dokyou Med |  |  |  |  |
|---|----------|----------|----------------------------------------------------------------------------|---------------------|------------|------------|------------|-----------|------------------|--------------|------------------|----------------------------|-------------------------|-----|---------|--------|--------|------|------------|--|--|--|--|
|   |          |          |                                                                            | over 95%            | 80% to 94% | 50% to 79% | 20% to 49% | 0% to 19% |                  |              |                  |                            |                         | 1h  | HPV-1-1 | HPV1-2 | HPV1-3 | HPV2 |            |  |  |  |  |
|   |          |          | Retinal dehydrogenase 1 OS=Homo sapiens OX=9606 GN=ALDH1A1 PE=1 SV=2       | ..                  | ALDH1...   | 55 kDa     |            | INF       |                  |              |                  |                            |                         |     |         |        |        |      | 2          |  |  |  |  |
|   |          |          | OTU domain-containing protein 5 OS=Homo sapiens OX=9606 GN=OTUD5 PE=1 SV=1 | ..                  | OTUD5      | 61 kDa     |            | INF       |                  |              |                  |                            |                         |     | 4       |        |        |      |            |  |  |  |  |
|   |          |          | Protein piccolo OS=Homo sapiens OX=9606 GN=PCLO PE=1 SV=5                  | ..                  | PCLO       | 561 kDa    |            | 0.7       | 1                | 4            | 0                | 1                          |                         |     |         |        |        |      | 1          |  |  |  |  |
|   |          |          | Ryanodine receptor 3 OS=Homo sapiens OX=9606 GN=RYS3 PE=1 SV=3             | ..                  | RYS3       | 552 kDa    |            | 0.2       | 2                |              | 0                | 1                          |                         |     |         |        |        |      | 3          |  |  |  |  |
|   |          |          | Protocadherin Fat 2 OS=Homo sapiens OX=9606 GN=FAT2 PE=1 SV=2              | ..                  | FAT2       | 479 kDa    |            | INF       | 0                | 1            | 8                |                            |                         |     |         |        |        |      |            |  |  |  |  |
